# Supplementary material
Source: PubMed Central journal article supplement (PMC3410444)

# Bioactive Diterpenoid Containing a Reversible “Spring-Loaded” (*E,Z*)- dieneone Michael Acceptor

Prasoon Gupta, Upasana Sharma, Thomas C. Schulz, Eric S. Sherrer, Amanda B. McLean, Allan  
J. Robins, and Lyndon M. West\*

Department of Chemistry and Biochemistry, Florida Atlantic University, Boca Raton, Florida  
33431, Department of Pharmaceutical and Biomedical Sciences, The University of Georgia,  
Athens, Georgia 30602, Viacyte Inc, 111 Riverbend Rd, Athens, Georgia 30602, and Department  
of Biochemistry and Molecular Biology, The University of Georgia, Athens, Georgia 30602.

## Supporting Information:

S1-S8: Experimental Procedures

S9: References

S10: <sup>13</sup>C NMR Data (125 MHz) for Briareolate Esters **1** – **3** (Table S1)

S11: Key NOE correlations observed for briareolate ester L (**1**) (Figure S1)

S12: Cytotoxic responses of briareolate ester L (**1**) against (**A**) human embryonic stem (BG02)  
cells, and (**B**) a pancreatic cancer (BxPC-3) cell line monitored by the RT-CES system  
(Figure S2)

S13: Cytotoxic responses of briareolate ester G (**4**) against (**A**) human embryonic stem (BG02)  
cells, and (**B**) a pancreatic cancer (BxPC-3) cell line monitored by the RT-CES system.  
(Figure S3)

- S14: Reaction of briareolate ester L (**1**) with thiophenol. **A**)  $^1\text{H}$  NMR spectrum ( $\text{CD}_3\text{OD}$ , 400MHz) of **1**. **B**)  $^1\text{H}$  NMR spectrum recorded 5 min after the addition of thiophenol (Figure S4)
- S15: Key NOE correlations observed for the thiophenol addition product (**7a-SPh**) (Figure S5)
- S16: Reaction of briareolate ester L (**1**) with cysteine methyl ester in the presence of DMAP. **A**)  $^1\text{H}$  NMR spectrum ( $\text{CD}_3\text{OD}$ , 400MHz) of **1**. **B**)  $^1\text{H}$  NMR spectrum recorded 24h after the addition of cysteine methyl ester and DMAP (Figure S6)
- S17: Optimized molecular structure of briareolate ester G (**4**) (Figure S7)
- S18: Photoisomerization of briareolate ester L (**1**)
- S19:  $^1\text{H}$  NMR spectrum of Briareolate ester L (**1**) ( $\text{CD}_3\text{OD}$ , 500 MHz)
- S20:  $^{13}\text{C}$  NMR spectrum of Briareolate ester L (**1**) ( $\text{CD}_3\text{OD}$ , 125 MHz)
- S21: gCOSY NMR spectrum Briareolate ester L (**1**) ( $\text{CD}_3\text{OD}$ , 500 MHz)
- S22: gHSQC NMR spectrum of Briareolate ester L (**1**) ( $\text{CD}_3\text{OD}$ , 500 MHz)
- S23: gHMBC NMR spectrum of Briareolate ester L (**1**) ( $\text{CD}_3\text{OD}$ , 500 MHz)
- S24: ROESY NMR spectrum of Briareolate ester L (**1**) ( $\text{CD}_3\text{OD}$ , 500 MHz)
- S25:  $^1\text{H}$  NMR spectrum of Briareolate ester M (**2**) ( $\text{CDCl}_3$ , 500 MHz)
- S26:  $^{13}\text{C}$  NMR spectrum of Briareolate ester M (**2**) ( $\text{CDCl}_3$ , 125 MHz)
- S27: gCOSY NMR spectrum Briareolate ester M (**2**) ( $\text{CDCl}_3$ , 500 MHz)
- S28: gHMBC NMR spectrum of Briareolate ester M (**2**) ( $\text{CDCl}_3$ , 500 MHz)
- S29:  $^1\text{H}$  NMR spectrum of Briareolate ester N (**3**) ( $\text{CDCl}_3$ , 500 MHz)
- S30:  $^{13}\text{C}$  NMR spectrum of Briareolate ester N (**3**) ( $\text{CDCl}_3$ , 125 MHz)
- S31: gCOSY NMR spectrum Briareolate ester N (**3**) ( $\text{CDCl}_3$ , 500 MHz)
- S32: gHSQC NMR spectrum of Briareolate ester N (**3**) ( $\text{CDCl}_3$ , 500 MHz)

- S33: gHMBC NMR spectrum of Briareolate ester N (**3**) (CDCl<sub>3</sub>, 500 MHz)
- S34: <sup>1</sup>H NMR spectrum of thiophenol addition product (**7a-SPh**) (CD<sub>3</sub>OD, 400 MHz)
- S35: <sup>13</sup>C NMR spectrum of thiophenol addition product (**7a-SPh**) (CD<sub>3</sub>OD, 100 MHz)
- S36: gCOSY NMR spectrum of thiophenol addition product (**7a-SPh**) (CD<sub>3</sub>OD, 400 MHz)
- S37: gHMBC NMR spectrum of thiophenol addition product (**7a-SPh**) (CD<sub>3</sub>OD, 400 MHz)
- S38: <sup>1</sup>H NMR spectrum of L-Cys-OMe addition product (**7b-L-Cys-OMe**) (CD<sub>3</sub>OD, 400 MHz)
- S39: <sup>13</sup>C NMR spectrum of L-Cys-OMe addition product (**7b-L-Cys-OMe**) (CD<sub>3</sub>OD, 100 MHz)
- S40: gCOSY NMR spectrum of L-Cys-OMe addition product (**7b-L-Cys-OMe**) (CD<sub>3</sub>OD, 400 MHz)
- S41: gHMBC NMR spectrum of L-Cys-OMe addition product (**7b-L-Cys-OMe**) (CD<sub>3</sub>OD, 400 MHz)

## Experimental Section

**General Experimental Procedures.** Optical rotations were measured on a Jasco P-2000 polarimeter (*c* g/100 mL) at 589 nm. UV spectra were obtained on a Perkin-Elmer Lambda EZ 210 UV–vis spectrophotometer. IR spectra were recorded on a Thermo Electronic Corporation Nicolet IR-100 spectrophotometer. All NMR spectra were recorded on a Varian Unity-INOVA 500 spectrometer. All chemical shifts ( $\delta$ ) were referenced internally to the residual solvent peak (CD<sub>3</sub>OD: <sup>1</sup>H,  $\delta$  3.30; <sup>13</sup>C,  $\delta$  49.0; CDCl<sub>3</sub>: <sup>1</sup>H 7.26 ppm; <sup>13</sup>C 77.0 ppm). Short- and long-range <sup>1</sup>H-<sup>13</sup>C correlations were determined with gradient-enhanced inverse-detected HSQC and HMBC experiments respectively. NOE correlations were detected with ROESY experiments with a 0.5 s

mixing time. The high-resolution ESI mass spectra performed on an APEX II FTICR mass spectrometer equipped with a 4.7 T magnet (Bruker-Daltonics, Bremen, Germany) were obtained from the University of Georgia Proteomic and Mass Spectrometry Core Facility. HPLC purifications were performed on Beckman System Gold HPLC system with a 168 UV detector and a SEDEX 85 (Sedere, Alfortville, France) evaporative light scattering detector. Thin layer chromatography (TLC) analyses were performed using Merck Kieselgel (Aufoilen) 60 F<sub>254</sub> plates. TLC plates were visualized by spraying with 1:1 MeOH:H<sub>2</sub>SO<sub>4</sub>.

**Collection, Extraction, and Isolation.** The gorgonian *Briareum asbestinum* was collected by hand using SCUBA at a depth of 15 m at Hillsboro Ledge, Boca Raton Florida, in 2007. The specimen was immediately frozen and kept at -20 °C until extraction. A voucher specimen has been deposited in Department of Chemistry and Biochemistry, Florida Atlantic University, Boca Raton (BR02-002). The specimens of *Briareum asbestinum* (150 g wet wt.) were extracted with MeOH (3 x 400 mL) for 18 h. The third, second and then the first extracts were passed through a column of HP-20 resin (2.5 x 25 cm) equilibrated with MeOH. The combined eluents were diluted with H<sub>2</sub>O (3.6 L) and passed again through the column. The column was eluted with 400 mL fractions of (1) H<sub>2</sub>O, (2) 40% Me<sub>2</sub>CO/H<sub>2</sub>O, (3) 75% Me<sub>2</sub>CO/H<sub>2</sub>O and (4) Me<sub>2</sub>CO. Fraction 3 was back-loaded onto an HP-20 column to remove the H<sub>2</sub>O by passing the fraction through a column of HP-20 resin (2.5 x 8.0 cm) equilibrated with H<sub>2</sub>O. The eluent was diluted with H<sub>2</sub>O (500 mL) and passed again through the column. The column was eluted with Me<sub>2</sub>CO (250 mL), and then 50% MeOH/Me<sub>2</sub>CO (250 mL), and the combined fractions concentrated to dryness. Fraction 3 was subjected to preparative C18 reversed-phase HPLC (Gemini 5 µm; 21.2 x 250 mm; 6 mL/min; 40–100% CH<sub>3</sub>CN/H<sub>2</sub>O over 60 min) to give briareolate ester L (**1**, 12.0 mg),



briareolate ester N (**3**, 9.0 mg), briareolate ester G (**4**, 15.0 mg), briareolate ester B (**5**, 13.0 mg), and briareolate ester C (**6**, 14.0 mg). Fraction 4 was concentrated to dryness and was subjected to column chromatography on silica gel 60 Merck (70-230 mesh, 80 g), eluting with n-hexane–EtOAc (from 100:0 to 0:100 gradient) to afford 13 fractions of 50 mL each. The constituents of fractions 7–9 were further purified by semi-preparative C18 reversed-phase HPLC (Gemini 5  $\mu\text{m}$ ; 10.0 x 250 mm; 4 mL/min; 50–100%  $\text{CH}_3\text{CN}/\text{H}_2\text{O}$  over 60 min) to yield briareolate ester M (**2**, 5.0 mg). Compounds **4** – **6** were identified by comparison of their  $^1\text{H}$  and  $^{13}\text{C}$  NMR spectra with the literature data.

**Briareolate ester L (1):** Colorless oil;  $[\alpha]_{\text{D}}^{25} +32$  ( $c$  0.02,  $\text{CHCl}_3$ ); UV (MeOH)  $\lambda_{\text{max}}$  237 nm ( $\epsilon$  2075), 284 ( $\epsilon$  1276); IR (KBr)  $\nu_{\text{max}}$  3500, 2933, 1733, 1650, 1456, 1367, 1248, 1174, 1024  $\text{cm}^{-1}$ ;  $^1\text{H}$  and  $^{13}\text{C}$  NMR (500 MHz,  $\text{CD}_3\text{OD}$ ) see Table 1. HRESIMS  $m/z$  515.2596  $[\text{M} + \text{Na}]^+$  (calcd for  $\text{C}_{27}\text{H}_{40}\text{O}_8\text{Na}$ , 515.2621).

**Briareolate ester M (2):** Colorless oil;  $[\alpha]_{\text{D}}^{25} +133$  ( $c$  0.06,  $\text{CHCl}_3$ ); UV (MeOH)  $\lambda_{\text{max}}$  232 nm ( $\epsilon$  3298), 284 ( $\epsilon$  2043); IR (KBr)  $\nu_{\text{max}}$  2929, 1734, 1649, 1457, 1368, 1249, 1172, 1089  $\text{cm}^{-1}$ ;  $^1\text{H}$  and  $^{13}\text{C}$  NMR (500 MHz,  $\text{CDCl}_3$ ) see Table 1. HRESIMS  $m/z$  613.3350  $[\text{M} + \text{Na}]^+$  (calcd for  $\text{C}_{33}\text{H}_{50}\text{O}_9\text{Na}$ , 613.3353).

**Briareolate ester N (3):** Colorless oil;  $[\alpha]_{\text{D}}^{25} +150$  ( $c$  0.07,  $\text{CHCl}_3$ ); UV (MeOH)  $\lambda_{\text{max}}$  282 nm ( $\epsilon$  5891); IR (KBr)  $\nu_{\text{max}}$  3500, 2933, 1733, 1650, 1456, 1367, 1248, 1174, 1024  $\text{cm}^{-1}$ ;  $^1\text{H}$  and  $^{13}\text{C}$

NMR (500 MHz, CDCl<sub>3</sub>) see Table 1. HRESIMS  $m/z$  613.3350 [M + Na]<sup>+</sup> (calcd for C<sub>33</sub>H<sub>50</sub>O<sub>9</sub>Na, 613.3353).

**Cell Culture.** BG02 hESCs were grown in defined medium, containing 10 ng/mL HRG1 $\beta$  (Peprotech), 10 ng/mL ActA (R&D Systems), 200 ng/mL LR<sup>3</sup>-IGF1 (JRH Biosciences), and 8 ng/mL FGF2 (Sigma or R&D Systems). Cultures were passaged with Accutase (Innovative Cell Technologies) and plated on tissue culture flasks coated with growth factor-reduced matrigel (BD Biosciences) diluted 1:200, as described by Robins and Schulz.<sup>1</sup> BxPC-3 pancreatic adenocarcinoma cells were acquired from ATCC and cultured in the same defined medium containing 10 ng/mL HRG1 $\beta$  (Peprotech), 200 ng/mL LR<sup>3</sup>-IGF1 (JRH Biosciences), and 10 ng/mL EGF (R&D Systems).<sup>2</sup> BxPC-3 cells were passaged using Accutase and plating on growth factor-reduced matrigel (BD Biosciences) diluted 1:200.

**RT-CES Cytotoxicity Assays.** The xCELLigence real-time impedance system (Roche) was used to monitor the effects of compounds on cells.<sup>3</sup> BG02 and BxPC-3 cells were plated at 10<sup>4</sup> and 2 x 10<sup>4</sup> cells/well, respectively, in matrigel coated plates. The cultures were placed in the reader station under standard humidified conditions and incubated at 37°C with 5% CO<sub>2</sub>. The media was changed every 24 h and impedance was measured every 15 min for 3 days. Compounds were added to quadruplicate wells 24 hours after plating. Vincristine was used as a positive control for cytotoxicity (EC<sub>50</sub> = 9.8 nM against BG02 cells), and DMSO alone was used as a negative control. Cell index plots were normalized immediately prior to addition of compound, and EC<sub>50</sub> values were generated using the xCELLigence analysis software RTCA ver 1.1 after 2 days of treatment.

**Reaction of Briareolate ester L (1) with Thiophenol.** A solution of briareolate L **1** (10  $\mu\text{M}$ ) and thiophenol (20  $\mu\text{M}$ ) in methanol- $d_4$  (600  $\mu\text{L}$ ) was prepared at 23°C. The reaction was monitored with  $^1\text{H}$  NMR every minute. After was 5 min at 23°C **1** was converted to **7a-SPh**. The NMR data reported below was then recorded;  $^1\text{H}$  NMR ( $\text{CD}_3\text{OD}$ , 400 MHz):  $\delta$  5.58 (br d,  $J = 8.4$ , H-2), 2.44 (m, H-3 $\alpha$ ), 1.27 (m, H-3 $\beta$ ), 2.21 (m, H<sub>2</sub>-4), 5.32 (d,  $J = 7.6$  Hz, H-6), 5.02 (d,  $J = 7.2$  Hz, H-7), 3.05 (d,  $J = 10.8$  Hz, H-10), 2.25 (m, H-11), 3.80 (br d,  $J = 3.8$  Hz, H-12), 2.01 (m, 13 $\alpha$ ), 1.87 (m, 13 $\beta$ ), 4.80 (t,  $J = 3.4$  Hz, H-14), 1.10 (s, H<sub>3</sub>-15), 1.60 (s, H<sub>3</sub>-16), 3.34 (q,  $J = 7.2$  Hz, H-17), 1.50 (d,  $J = 7.2$  Hz, H<sub>3</sub>-18), 0.93 (d,  $J = 7.2$  Hz, H<sub>3</sub>-20), 1.98 (s, 3H for ester methyl), 2.21 (t,  $J = 6.4$  Hz, 2H), 1.60 (m, 2H), 0.91 (t,  $J = 7.2$  Hz, 3H);  $^{13}\text{C}$  NMR ( $\text{CD}_3\text{OD}$ , 100 MHz):  $\delta$  44.8 (C-1), 81.8 (C-2), 29.9 (C-3), 34.4 (C-4), 142.3 (C-5), 126.2 (C-6), 49.6 (C-7), 114.4 (C-8), 154.3 (C-9), 42.3 (C-10), 33.7 (C-11), 70.7 (C-12), 32.3 (C-13), 75.6 (C-14), 13.8 (C-15), 27.9 (C-16), 40.8 (C-17), 16.3 (C-18), 181.4 (C-19), 17.0 (C-20), 53.3 (OCH<sub>3</sub>) 172.8 (C-14 ester C=O), 175.2 (C-2 ester C=O), 22.1 (C-14 ester methyl), 37.7, 19.3 and 14.2 (C-2 propyl ester chain); MS (ESI)  $m/z$  625.2 [ $\text{M} + \text{Na}$ ]<sup>+</sup>.

**Reaction of Briareolate ester L (1) with L-Cysteine methyl ester HCl.** A solution of briareolate L **1** (10  $\mu\text{M}$ ), L-Cys-OMe HCl (20  $\mu\text{M}$ ) and a catalytic amount of DMAP (5  $\mu\text{M}$ ) in methanol- $d_4$  (600  $\mu\text{L}$ ) was prepared at 23°C. The reaction was monitored by  $^1\text{H}$  NMR spectroscopy. After was 24h at 23°C **1** was converted to **7b-L-Cys-OMe**. The NMR data reported below was then recorded.  $^1\text{H}$  NMR ( $\text{CD}_3\text{OD}$ , 400 MHz):  $\delta$  5.30 (d,  $J = 8.4$ , H-2), 2.20 (m, H-3 $\alpha$ ), 1.78 (m, H-3 $\beta$ ), 2.26 (m, H<sub>2</sub>-4), 5.19 (d,  $J = 10.4$  Hz, H-6), 4.15 (d,  $J = 10.4$  Hz, H-7), 3.18 (d,  $J = 11.2$  Hz, H-10), 1.93 (m, H-11), 3.80 (dd,  $J = 8.4$ , 2.4 Hz, H-12), 2.28 (m, 13 $\alpha$ ), 2.03 (m, 13 $\beta$ ), 4.69 (t,  $J = 2.8$  Hz, H-14), 1.08 (s, H<sub>3</sub>-15), 1.86 (s, H<sub>3</sub>-16), 2.76 (q,  $J = 7.2$  Hz, H-

17), 1.36 (d,  $J = 6.8$  Hz, H<sub>3</sub>-18), 1.06 (d,  $J = 6.8$  Hz, H<sub>3</sub>-20), 1.93 (s, 3H for ester methyl), 2.17 (t,  $J = 6.4$  Hz, 2H), 1.53 (m, 2H), 0.91 (t,  $J = 7.6$  Hz, 3H); <sup>13</sup>C NMR (CD<sub>3</sub>OD, 100 MHz): δ 45.5 (C-1), 80.2 (C-2), 29.2 (C-3), 30.1 (C-4), 149.1 (C-5), 119.0 (C-6), 54.5 (C-7), 63.8 (C-8), 214.0 (C-9), 48.8 (C-10), 37.5 (C-11), 69.4 (C-12), 30.9 (C-13), 73.2 (C-14), 13.4 (C-15), 28.2 (C-16), 38.0 (C-17), 15.8 (C-18), 176.7 (C-19), 11.2 (C-20), 56.8 (OCH<sub>3</sub>) 170.5 (C-14 ester C=O), 174.0 (C-2 ester C=O), 21.8 (C-14 ester methyl), 35.7, 17.4 and 13.8 (C-2 propyl ester chain); MS (ESI)  $m/z$  559.3 [M + H<sub>2</sub>O - C<sub>3</sub>H<sub>5</sub>NO<sub>2</sub>]<sup>+</sup>.

**Reversal of the 1,4 Addition Product (7a-SPh) to Briareolate ester L (1).** A solution of **7a-SPh** and thiophenol in methanol-*d*<sub>4</sub> (600 μL) was passed through a column of HP20ss (1 × 2 cm). The eluent was diluted with H<sub>2</sub>O (1 mL) and re-passed through the column. The column was washed with water and eluted with 10 mL fractions of (1) 20% Me<sub>2</sub>CO/H<sub>2</sub>O, (2) 40% Me<sub>2</sub>CO/H<sub>2</sub>O, (3) 80% Me<sub>2</sub>CO/H<sub>2</sub>O, and Me<sub>2</sub>CO. The 80% Me<sub>2</sub>CO/H<sub>2</sub>O fraction was concentrated to dryness to afford **1**. Colorless oil; <sup>1</sup>H NMR data (CDCl<sub>3</sub>, 400 MHz) see Table 1.

**Photoisomerization of Briareolate ester L (1).** A solution of briareolate L **1** (10 μM) in methanol-*d*<sub>4</sub> (600 μL) was prepared and placed in direct exposure to UV light (200 W). The reaction was monitored by <sup>1</sup>H NMR spectroscopy. After 120 h **1** was converted to **4**. The photolyzed solution was dried under vacuum and the NMR data was then recorded. Colorless oil;  $[\alpha]_D^{25} -40$  (*c* 0.07, CHCl<sub>3</sub>); NMR data (CDCl<sub>3</sub>, 400 MHz) as previously reported for **4**.<sup>4</sup>

## References.

- (1) Lakshmipathy, U.; Chesnut, J. D.; Thyagarajan, B. *Emerging technology platforms for stem cells*; Wiley-Blackwell: Oxford, **2009**.
- (2) Tan, M. H.; Nowak, N. J.; Loo, R.; Ochi, H.; Sandberg, A. A.; Lopez, C.; Pickren, J. W.; Berjian, R.; Douglass, H. O.; Chu, T. M. *Cancer Invest.* **1986**, *4*, 15-23.
- (3) Solly, K.; Wang, X.; Xu, X.; Strulovici, B.; Zheng, W. *Assay Drug Dev. Technol.* **2004**, *2*, 363-372.
- (4) Mootoo, B. S.; Ramsewak, R.; Sharma, R.; Tinto, W. F.; Lough, A. J.; McLean, S.; Reynolds, W. F.; Yang, J. P.; Yu, M. *Tetrahedron* **1996**, *52*, 9953-9962.

**Table S1.**  $^{13}\text{C}$  NMR Data (125 MHz) for Briareolate Esters **1** – **3**

|                  | <b>1</b> <sup>a</sup>                    | <b>2</b> <sup>b</sup>       | <b>3</b> <sup>b</sup>       |
|------------------|------------------------------------------|-----------------------------|-----------------------------|
| position         | $\delta_{\text{C}}$ , mult. <sup>c</sup> | $\delta_{\text{C}}$ , mult. | $\delta_{\text{C}}$ , mult. |
| 1                | 46.8, qC                                 | 45.2, qC                    | 45.9, qC                    |
| 2                | 79.9, CH                                 | 77.6, CH                    | 78.3, CH                    |
| 3                | 31.9, CH <sub>2</sub>                    | 31.7, CH <sub>2</sub>       | 28.9, CH <sub>2</sub>       |
| 4                | 34.8, CH <sub>2</sub>                    | 33.7, CH <sub>2</sub>       | 35.1, CH <sub>2</sub>       |
| 5                | 141.7, qC                                | 140.4, qC                   | 75.5, qC                    |
| 6                | 118.5, CH                                | 116.8, CH                   | 130.3, CH                   |
| 7                | 147.0, CH                                | 145.2, CH                   | 120.6, CH                   |
| 8                | 148.1, qC                                | 146.5, qC                   | 117.8, qC                   |
| 9                | 201.4, qC                                | 198.9, qC                   | 151.4, qC                   |
| 10               | 48.4, CH                                 | 47.9, CH                    | 37.6, CH                    |
| 11               | 35.9, CH                                 | 33.2, CH                    | 32.3, CH                    |
| 12               | 70.5, CH                                 | 73.0, CH                    | 72.4, CH                    |
| 13               | 32.7, CH <sub>2</sub>                    | 29.1, CH <sub>2</sub>       | 31.4, CH <sub>2</sub>       |
| 14               | 76.0, CH                                 | 70.3, CH                    | 74.3, CH                    |
| 15               | 12.6, CH <sub>3</sub>                    | 14.7, CH <sub>3</sub>       | 15.3, CH <sub>3</sub>       |
| 16               | 27.1, CH <sub>3</sub>                    | 26.8, CH <sub>3</sub>       | 24.0, CH <sub>3</sub>       |
| 17               | 40.2, CH                                 | 38.9, CH                    | 38.0, CH                    |
| 18               | 16.8, CH <sub>3</sub>                    | 16.2, CH <sub>3</sub>       | 14.7, CH <sub>3</sub>       |
| 19               | 176.5, qC                                | 174.5, qC                   | 174.9, qC                   |
| 20               | 17.6, CH <sub>3</sub>                    | 16.6, CH <sub>3</sub>       | 15.4, CH <sub>3</sub>       |
| OCH <sub>3</sub> | 52.5, CH <sub>3</sub>                    | 52.0, CH <sub>3</sub>       | 52.3, CH <sub>3</sub>       |
| ester at C-2     | 175.5, qC                                | 173.2, qC                   | 173.1, qC                   |
|                  | 37.7, CH <sub>2</sub>                    | 36.3, CH <sub>2</sub>       | 36.7, CH <sub>2</sub>       |
|                  | 19.7, CH <sub>2</sub>                    | 18.2, CH <sub>2</sub>       | 18.6, CH <sub>2</sub>       |
|                  | 14.5, CH <sub>3</sub>                    | 14.1, CH <sub>3</sub>       | 14.1, CH <sub>3</sub>       |
| ester at C-12    |                                          | 173.1, qC                   | 172.9, qC                   |
|                  |                                          | 34.7, CH <sub>2</sub>       | 35.2, CH <sub>2</sub>       |
|                  |                                          | 24.9, CH <sub>2</sub>       | 25.1, CH <sub>2</sub>       |
|                  |                                          | 31.3, CH <sub>2</sub>       | 31.7, CH <sub>2</sub>       |
|                  |                                          | 22.4, CH <sub>2</sub>       | 22.5, CH <sub>2</sub>       |
|                  |                                          | 15.8, CH <sub>3</sub>       | 14.2, CH <sub>3</sub>       |
| ester at C-14    | 173.2, qC                                | 170.1, qC                   | 170.3, qC                   |
|                  | 22.3, CH <sub>3</sub>                    | 21.4, CH <sub>3</sub>       | 21.3, CH <sub>3</sub>       |

<sup>a</sup> Measured in CD<sub>3</sub>OD. <sup>b</sup> Measured in CDCl<sub>3</sub>. <sup>c</sup> Multiplicities were assigned by a multiplicity-edited gHSQC.



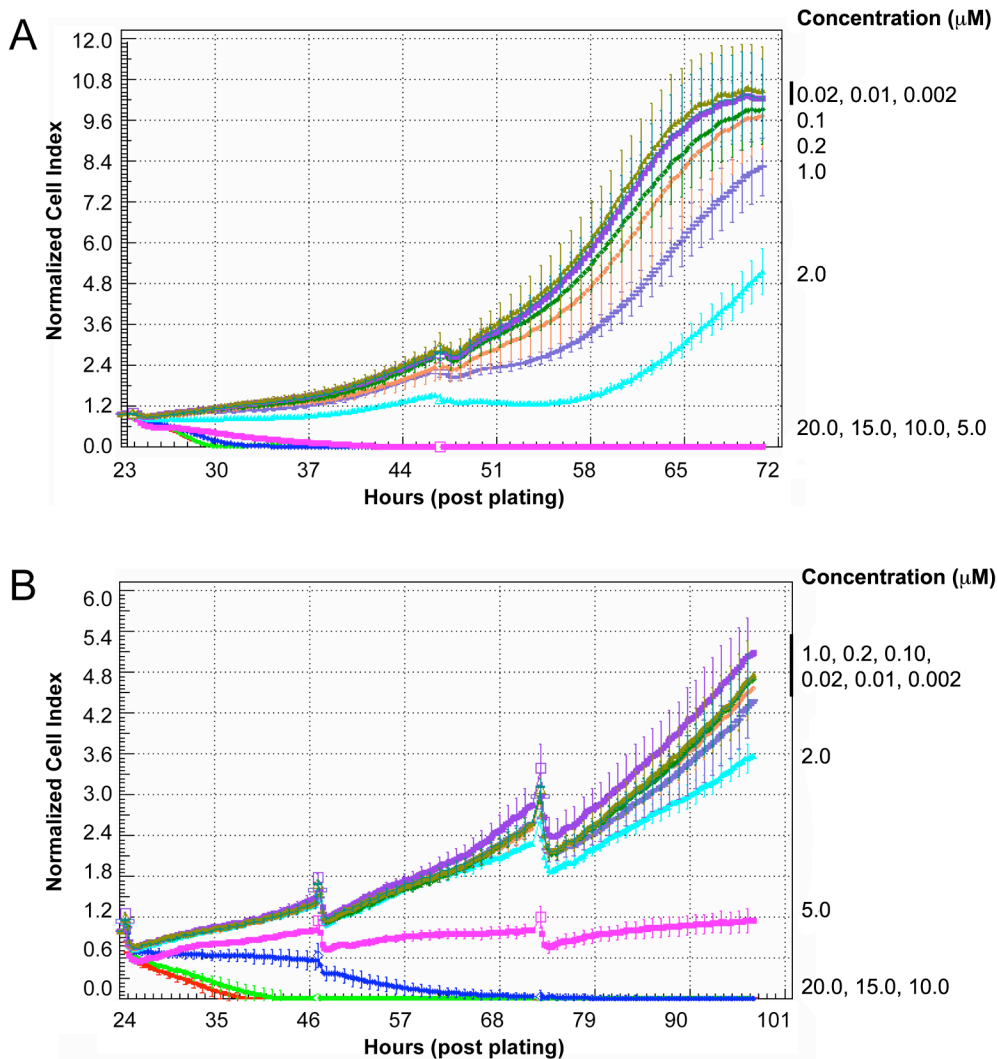

**Figure S2.** Evaluation of cytotoxic responses of briareolate ester L (**1**) against (**A**) human embryonic stem (BG02) cells, and (**B**) a pancreatic cancer (BxPC-3) cell line monitored by the RT-CES system. The error bars indicate the corresponding standard deviation.



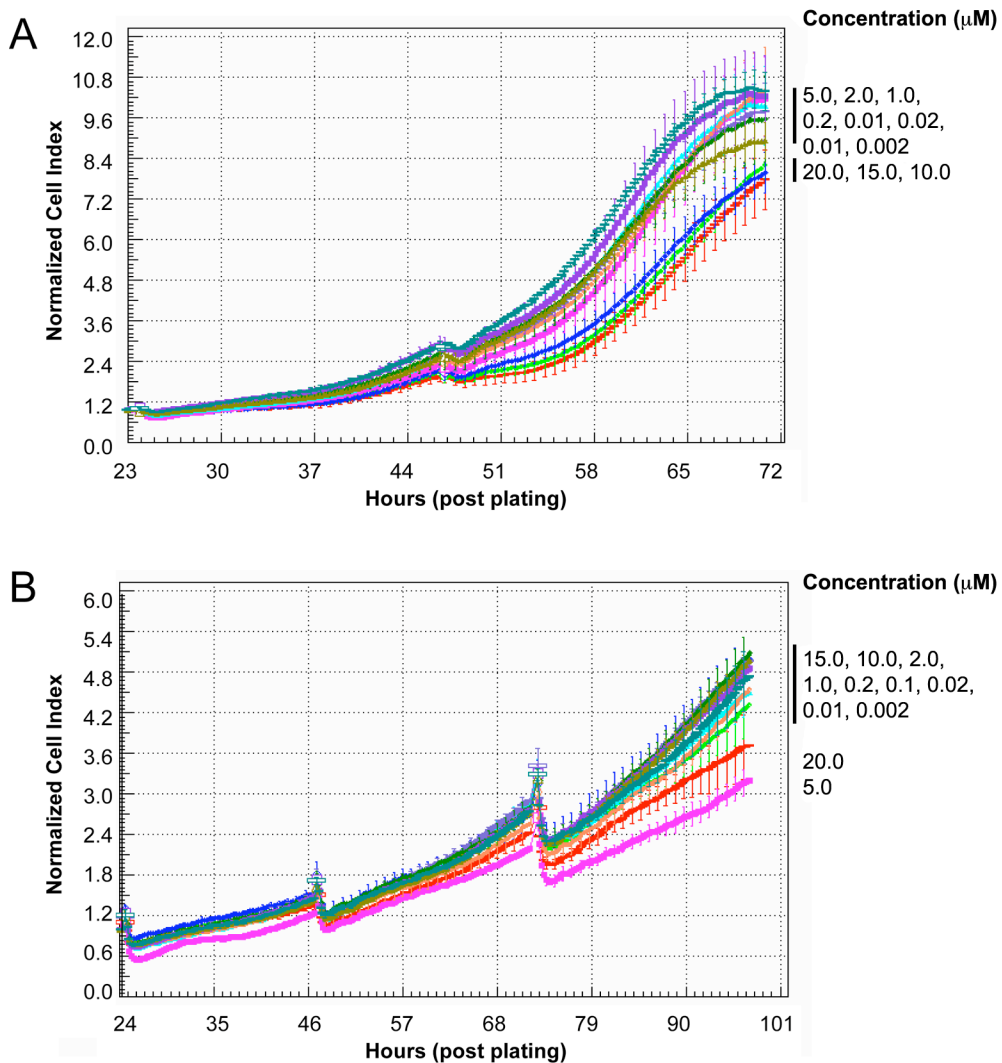

**Figure S3.** Evaluation of cytotoxic responses of briareolate ester G (**4**) against (**A**) human embryonic stem (BG02) cells, and (**B**) a pancreatic cancer (BxPC-3) cell line monitored by the RT-CES system. The error bars indicate the corresponding standard deviation.

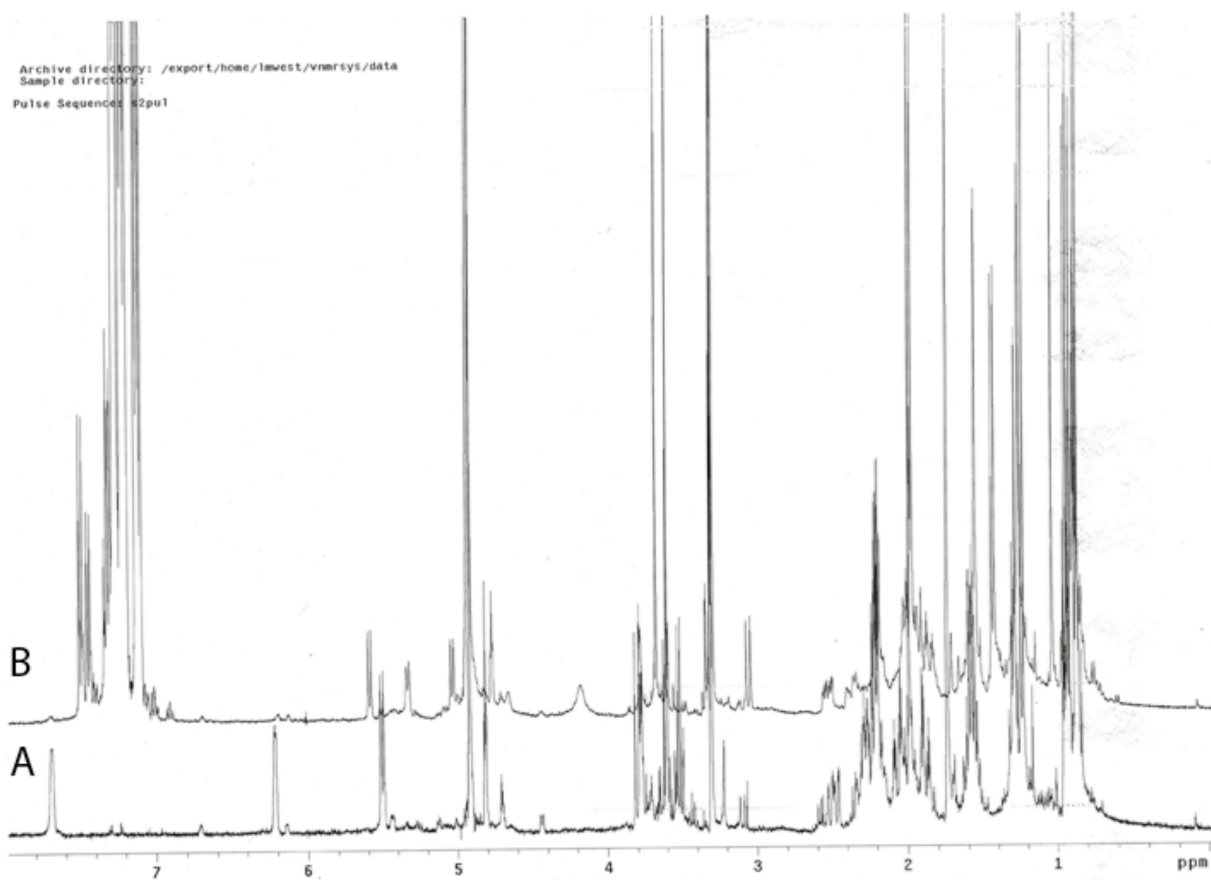

**Figure S4.** Reaction of briareolate ester L (**1**) with thiophenol. **A)**  $^1\text{H}$  NMR spectrum ( $\text{CD}_3\text{OD}$ , 400MHz) of **1**. **B)**  $^1\text{H}$  NMR spectrum recorded 5 min after the addition of thiophenol.



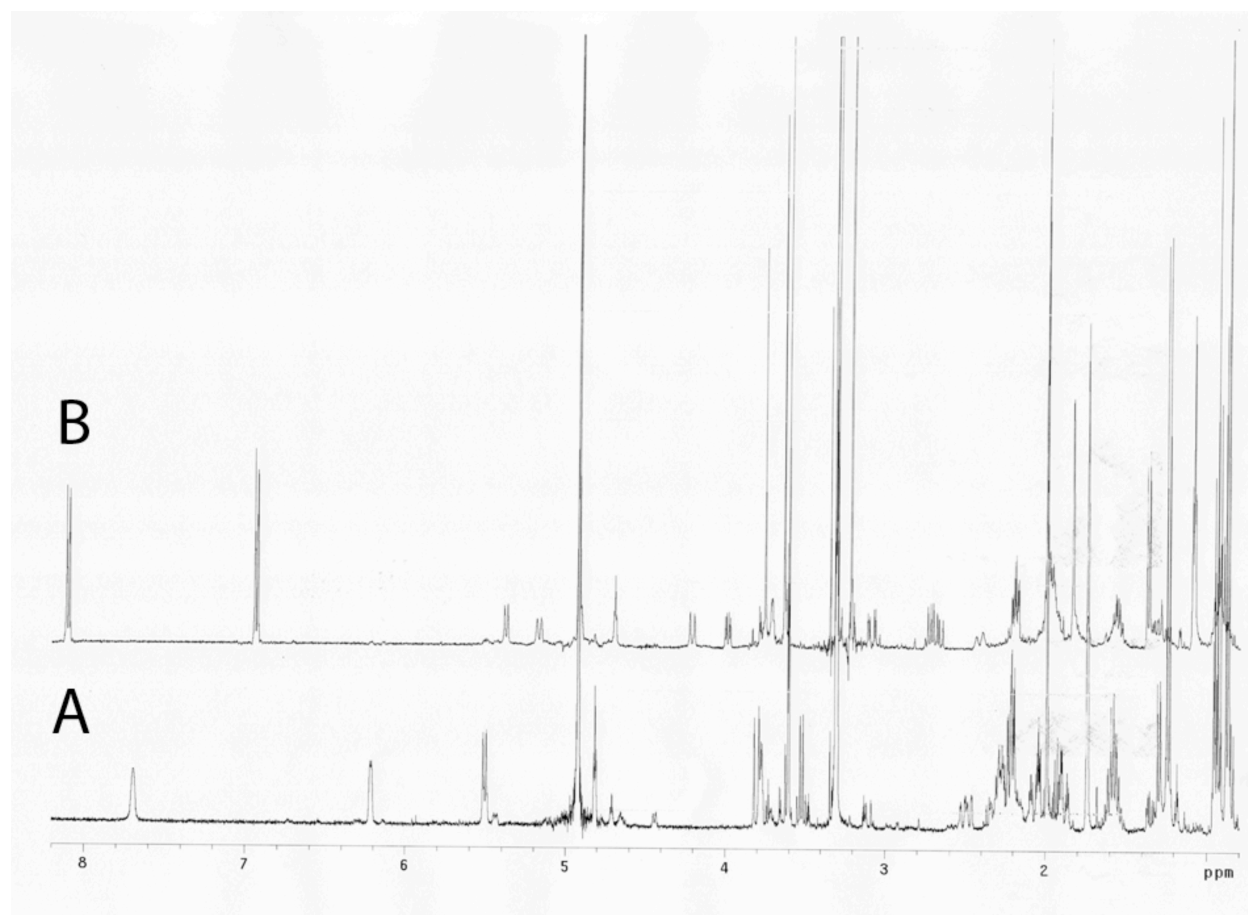

**Figure S6.** Reaction of briareolate ester L (**1**) with cysteine methyl ester in the presence of DMAP. **A)**  $^1\text{H}$  NMR spectrum ( $\text{CD}_3\text{OD}$ , 400MHz) of **1**. **B)**  $^1\text{H}$  NMR spectrum recorded 24h after the addition of cysteine methyl ester and DMAP.

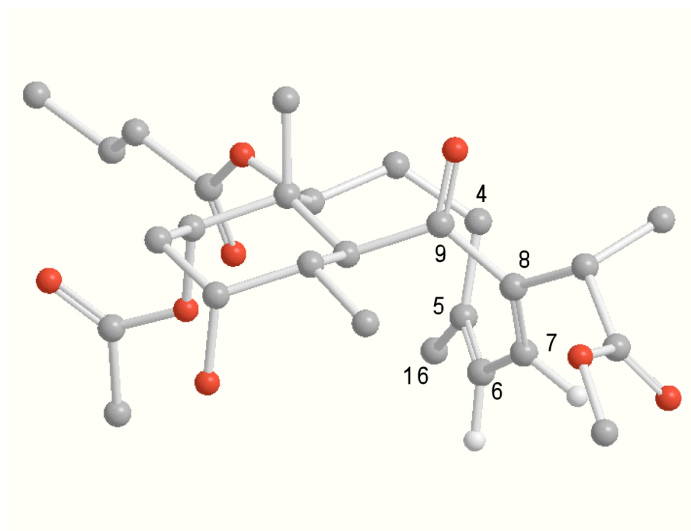

**Figure S7.** Optimized molecular structure of briareolate ester G (4).

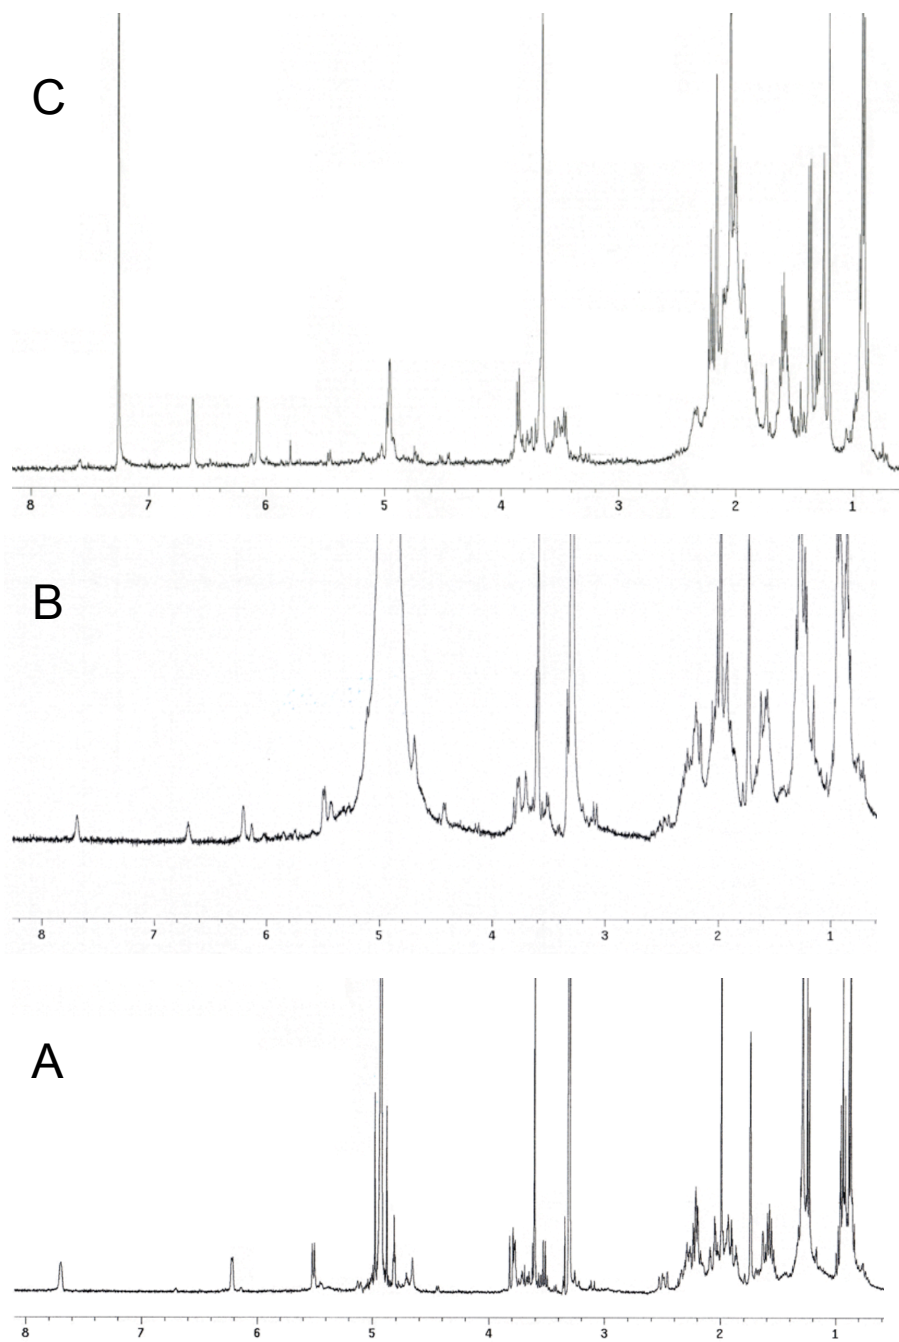

**Figure S8.** Photoisomerization of briareolate ester L (**1**). **A**)  $^1\text{H}$  NMR spectrum ( $\text{CD}_3\text{OD}$ , 400MHz) of **1** recorded after 4 h. **B**)  $^1\text{H}$  NMR spectrum ( $\text{CD}_3\text{OD}$ , 400MHz) recorded after 48 h. **C**)  $^1\text{H}$  NMR ( $\text{CDCl}_3$ , 400MHz) spectrum recorded after 120 h.

<sup>1</sup>H NMR spectrum of Briareolate ester L (1) (CD<sub>3</sub>OD, 500 MHz)

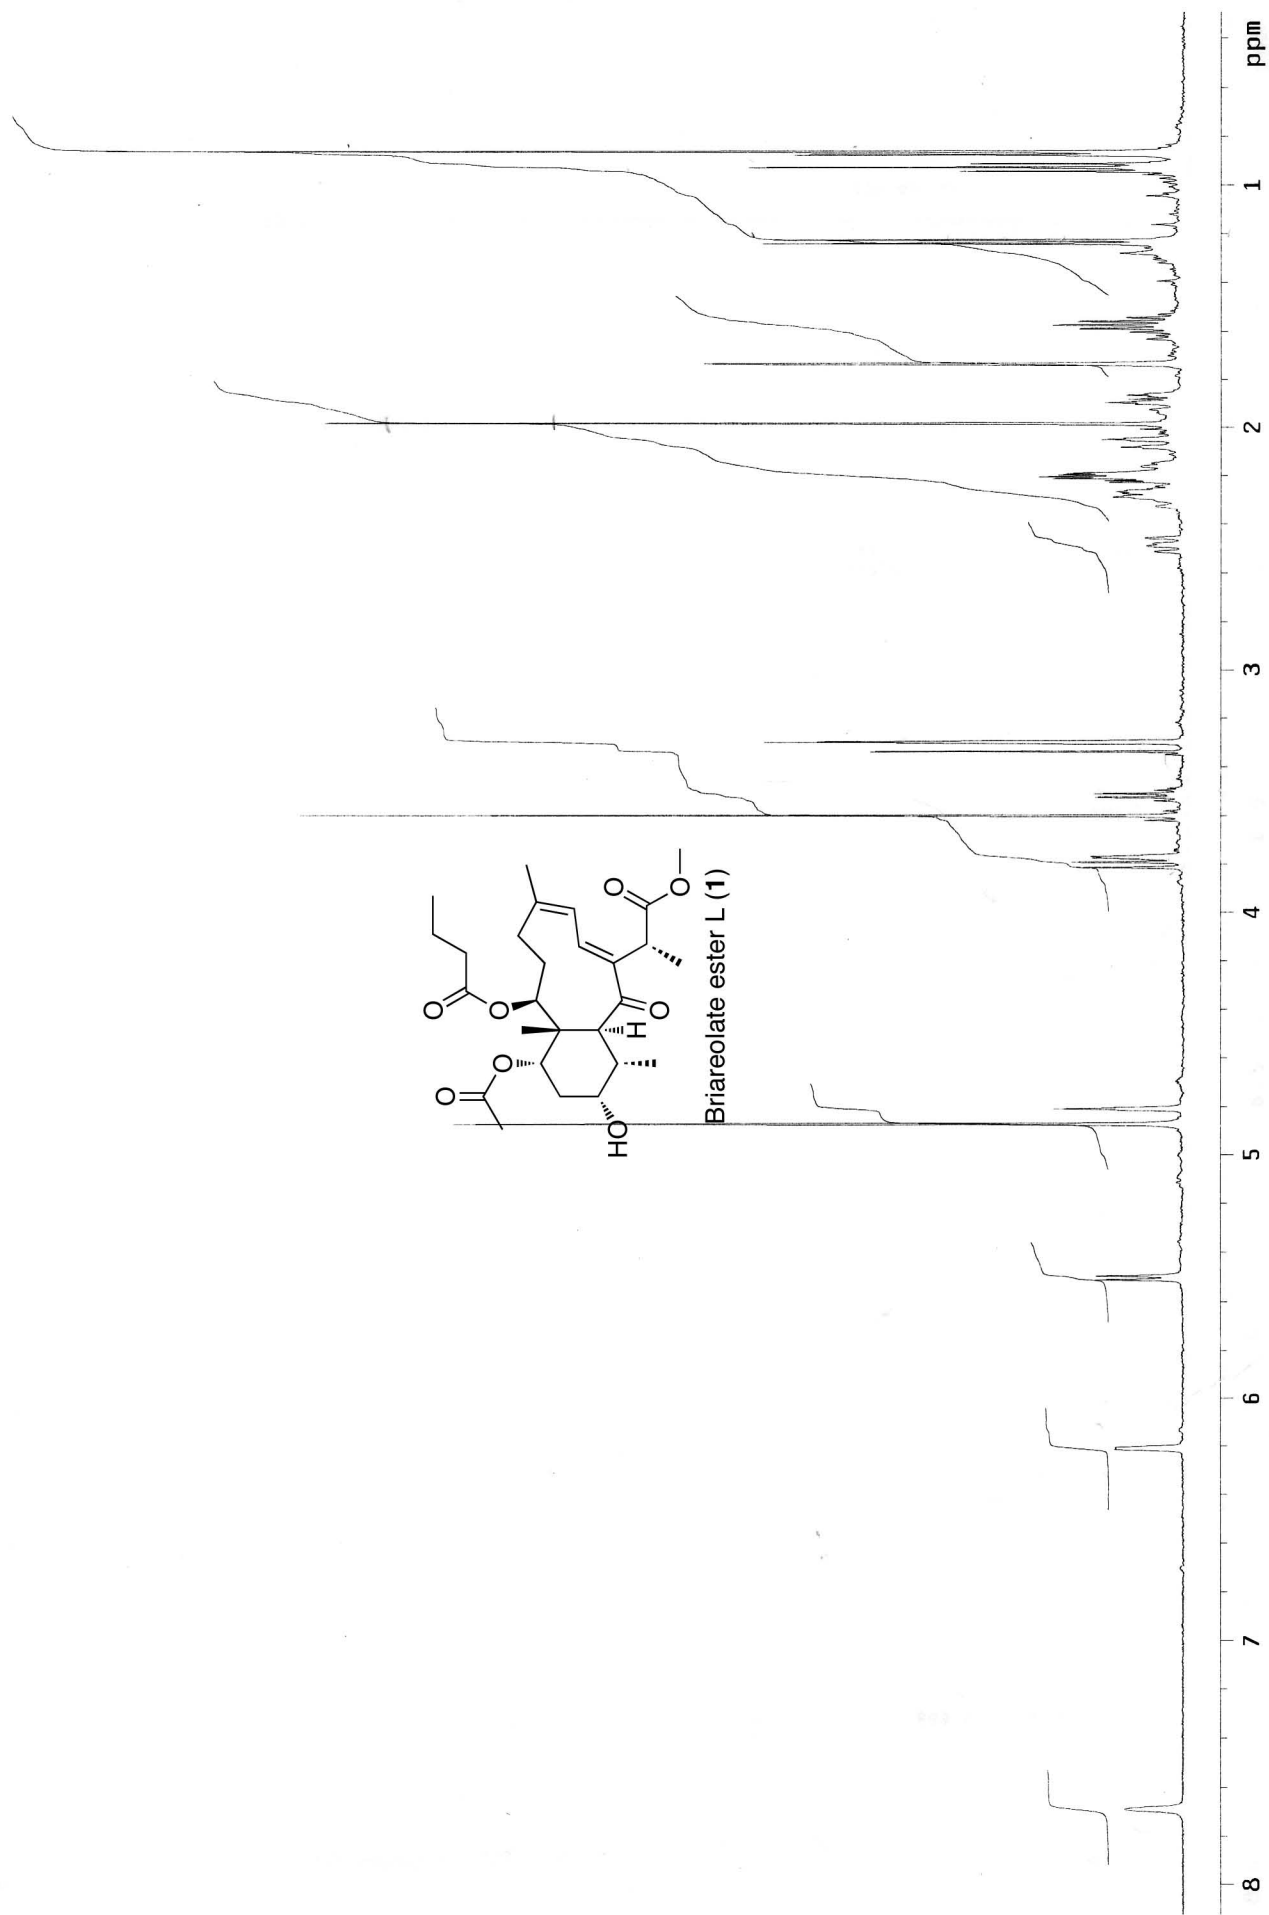

$^{13}\text{C}$  NMR spectrum of Briareolate ester L (1) ( $\text{CD}_3\text{OD}$ , 125 MHz)

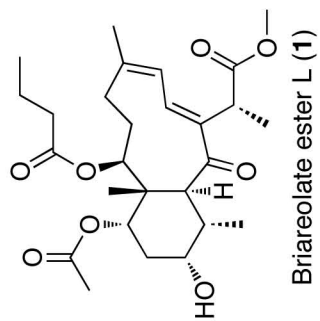

ppm

200

180

160

140

120

100

80

60

40

20

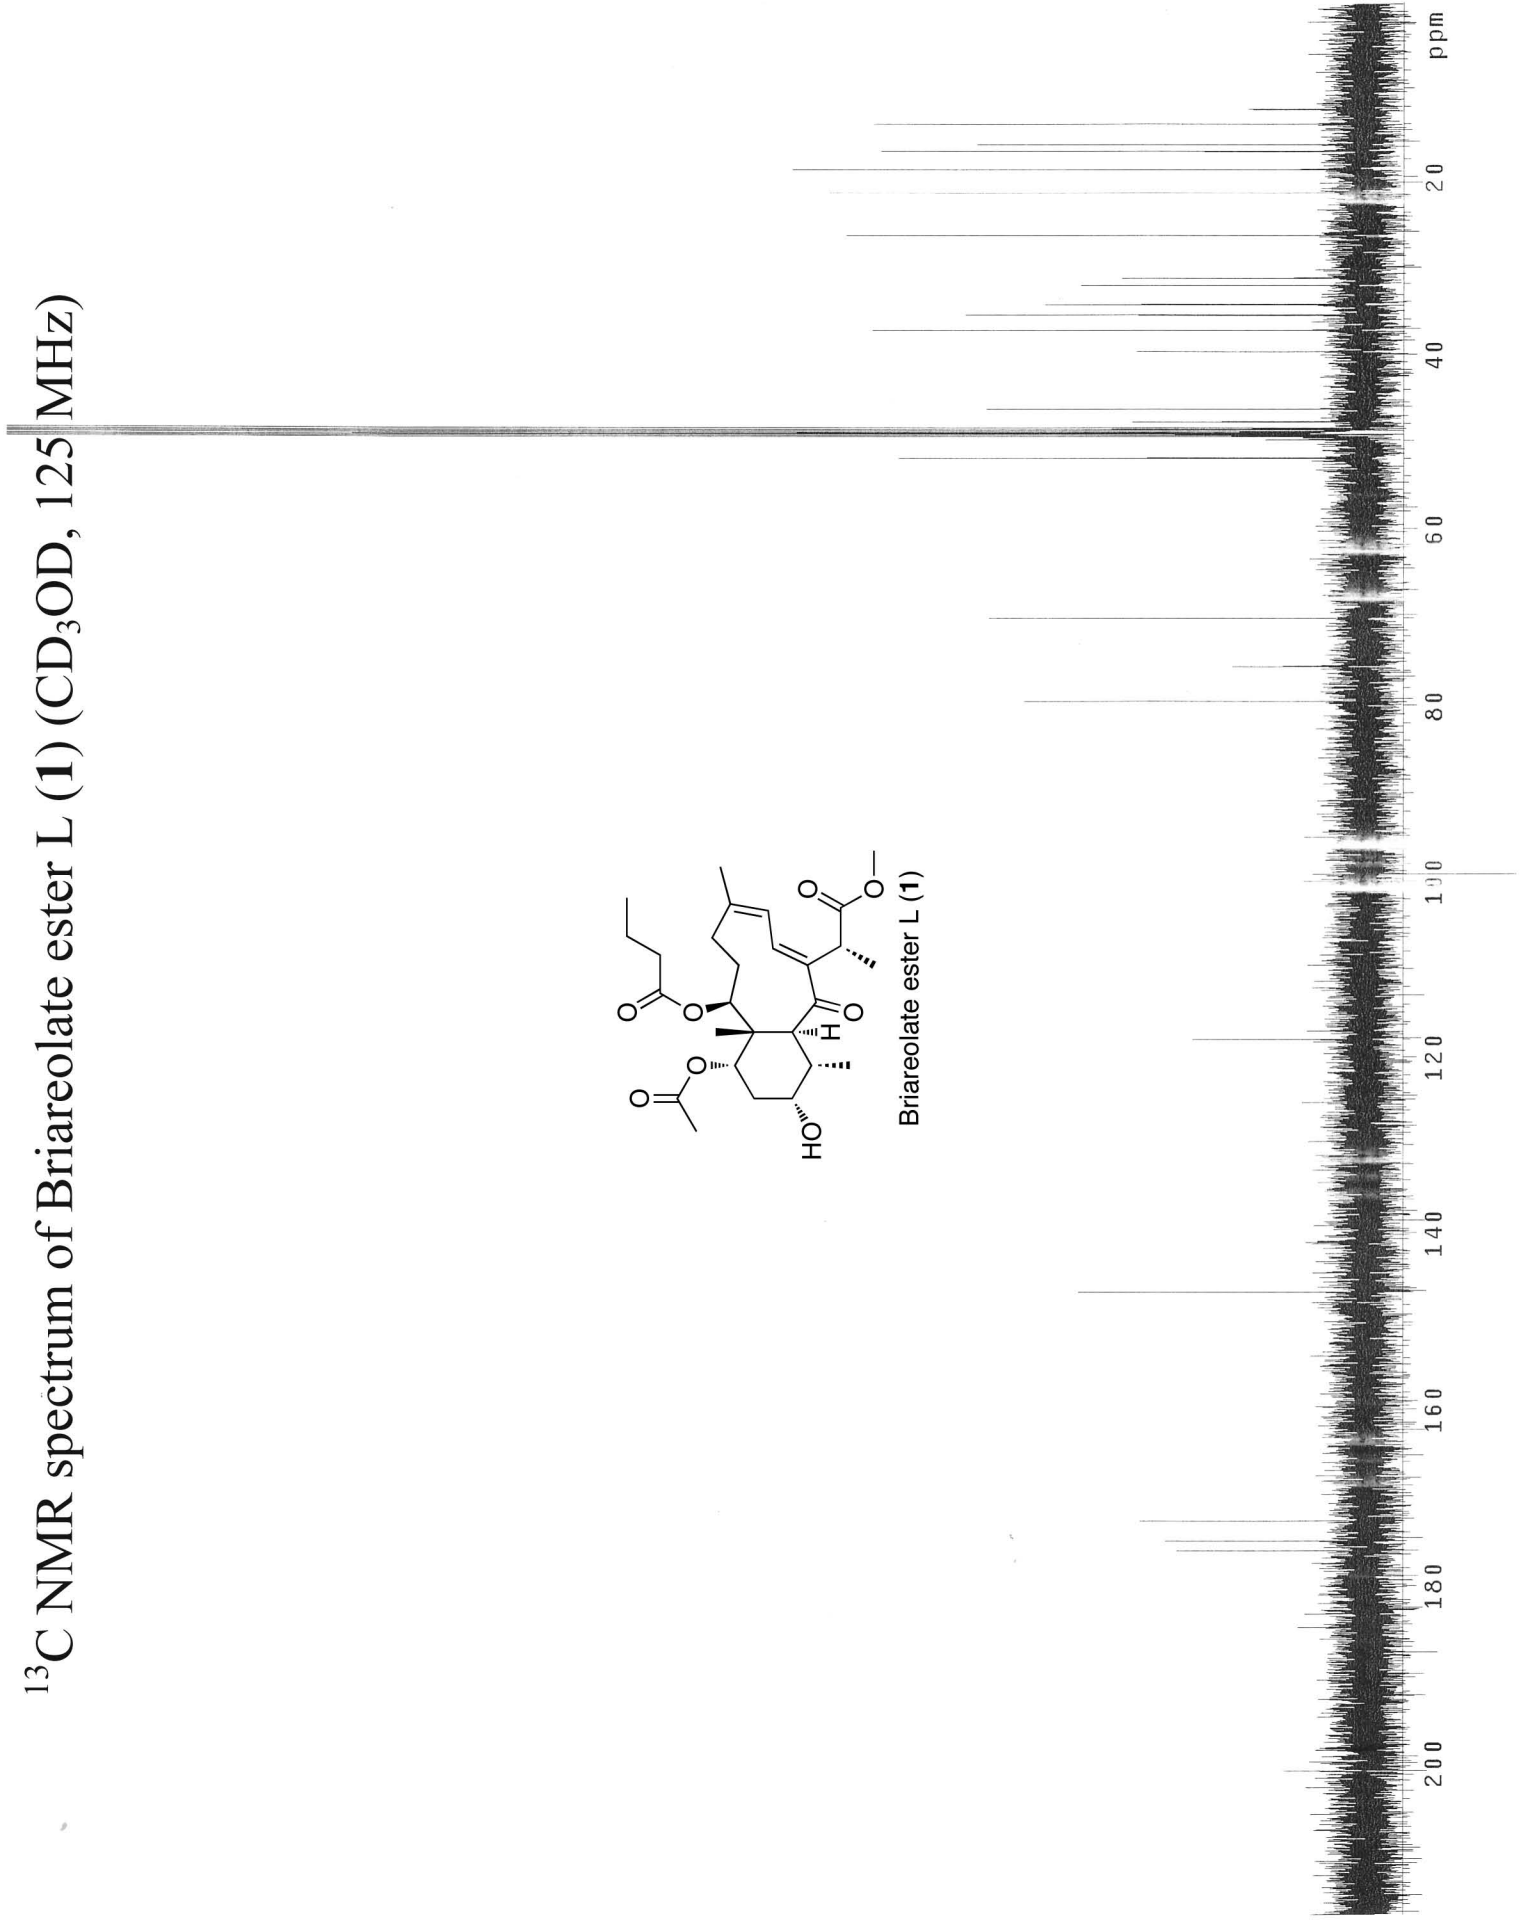



gCOSY NMR spectrum Briareolate ester L (1) (CD<sub>3</sub>OD, 500 MHz)

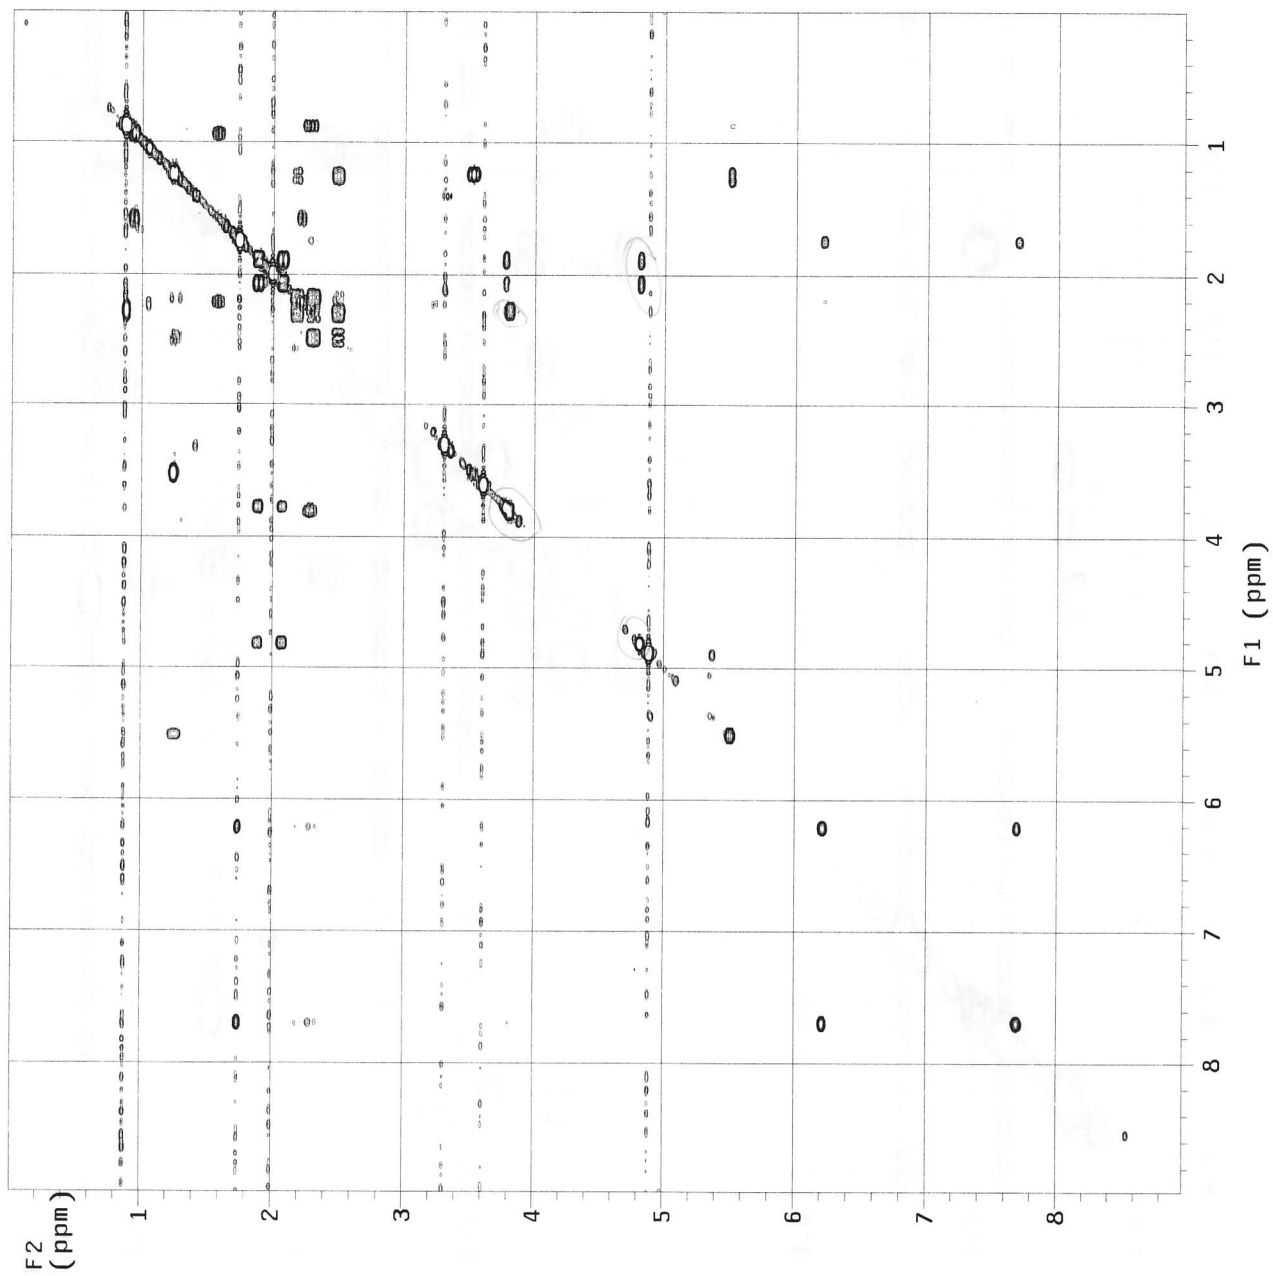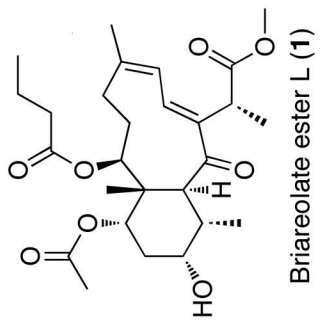

gHSQC NMR spectrum of Briareolate ester L (1) (CD<sub>3</sub>OD, 500 MHz)

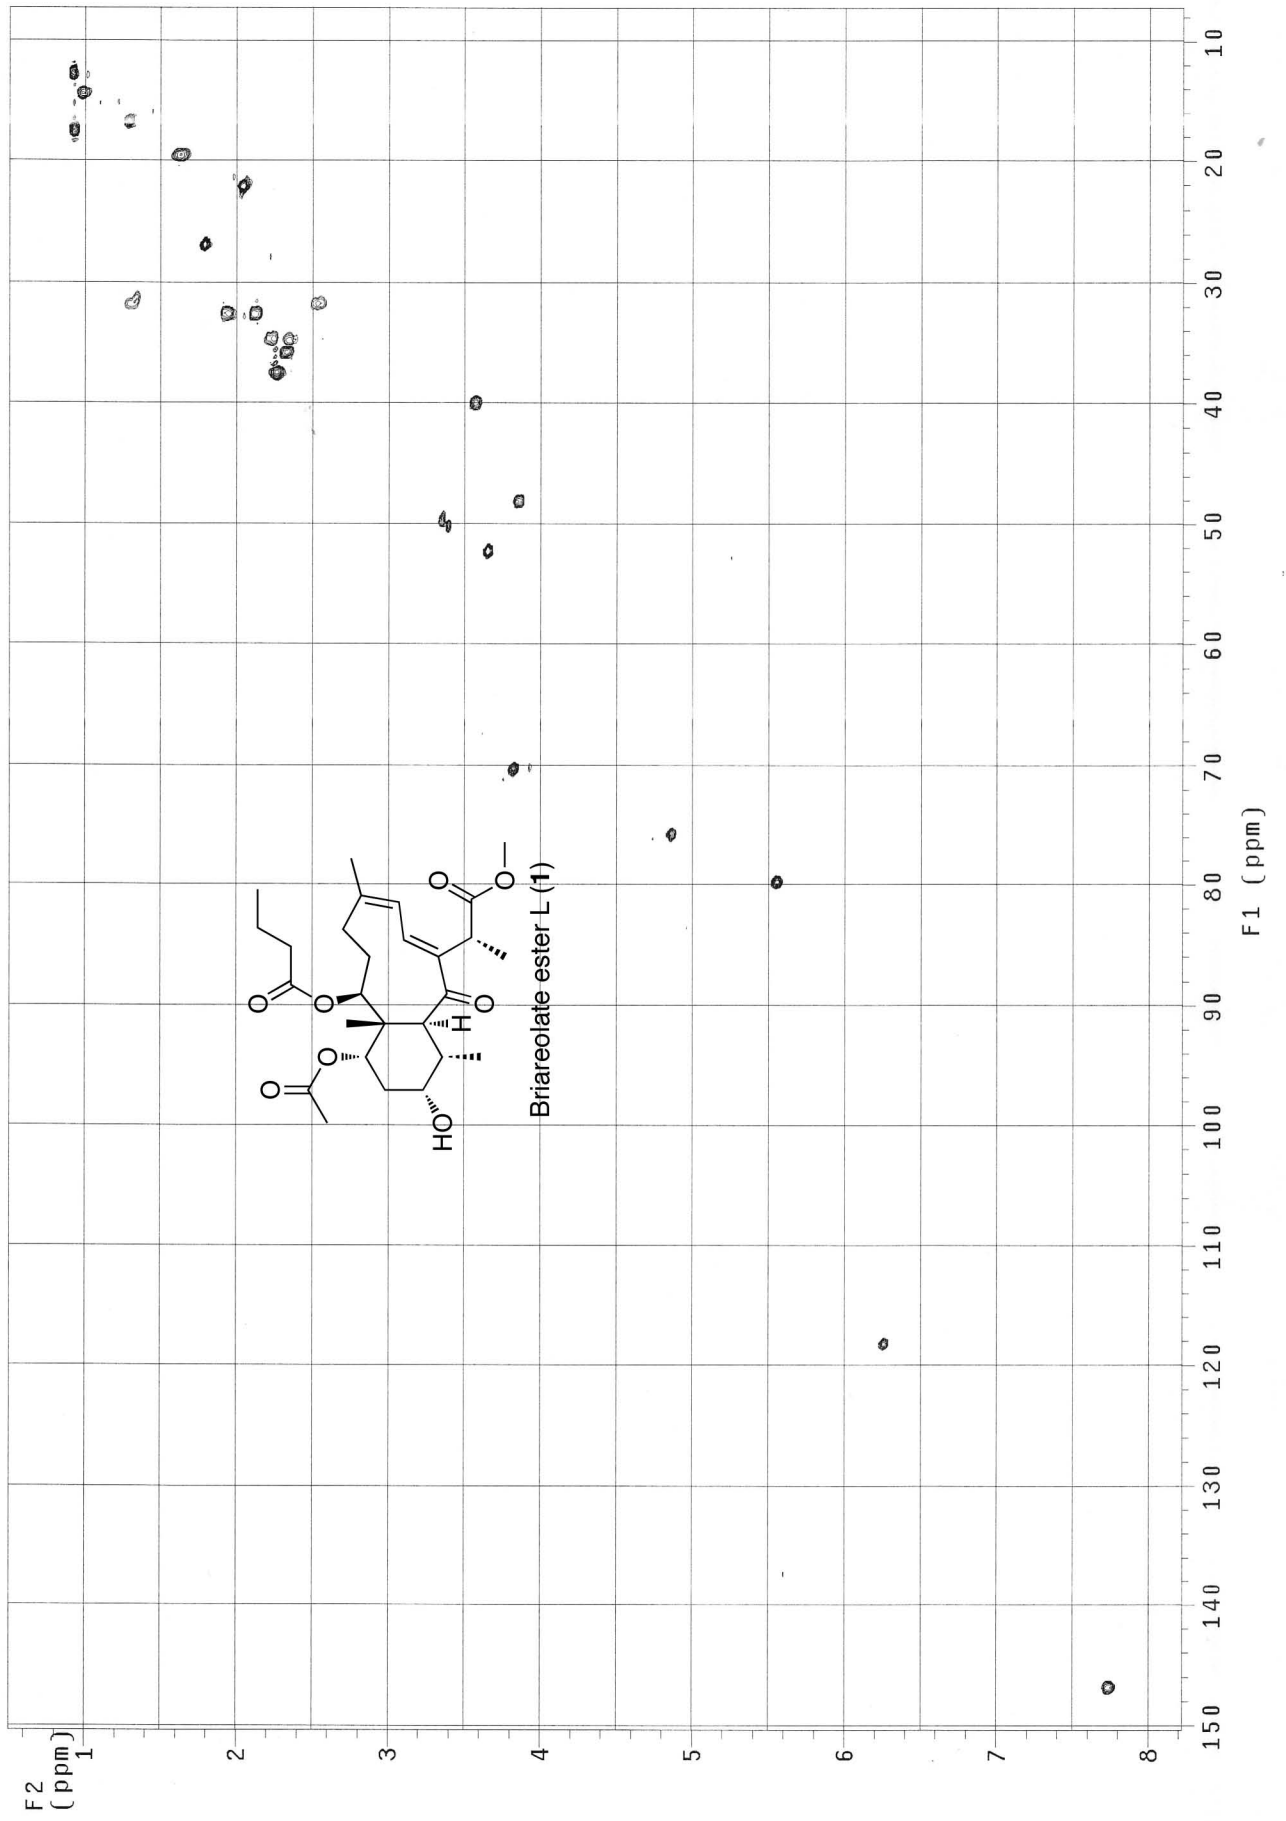

gHMBC NMR spectrum of Briareolate ester L (1) (CD<sub>3</sub>OD, 500 MHz)

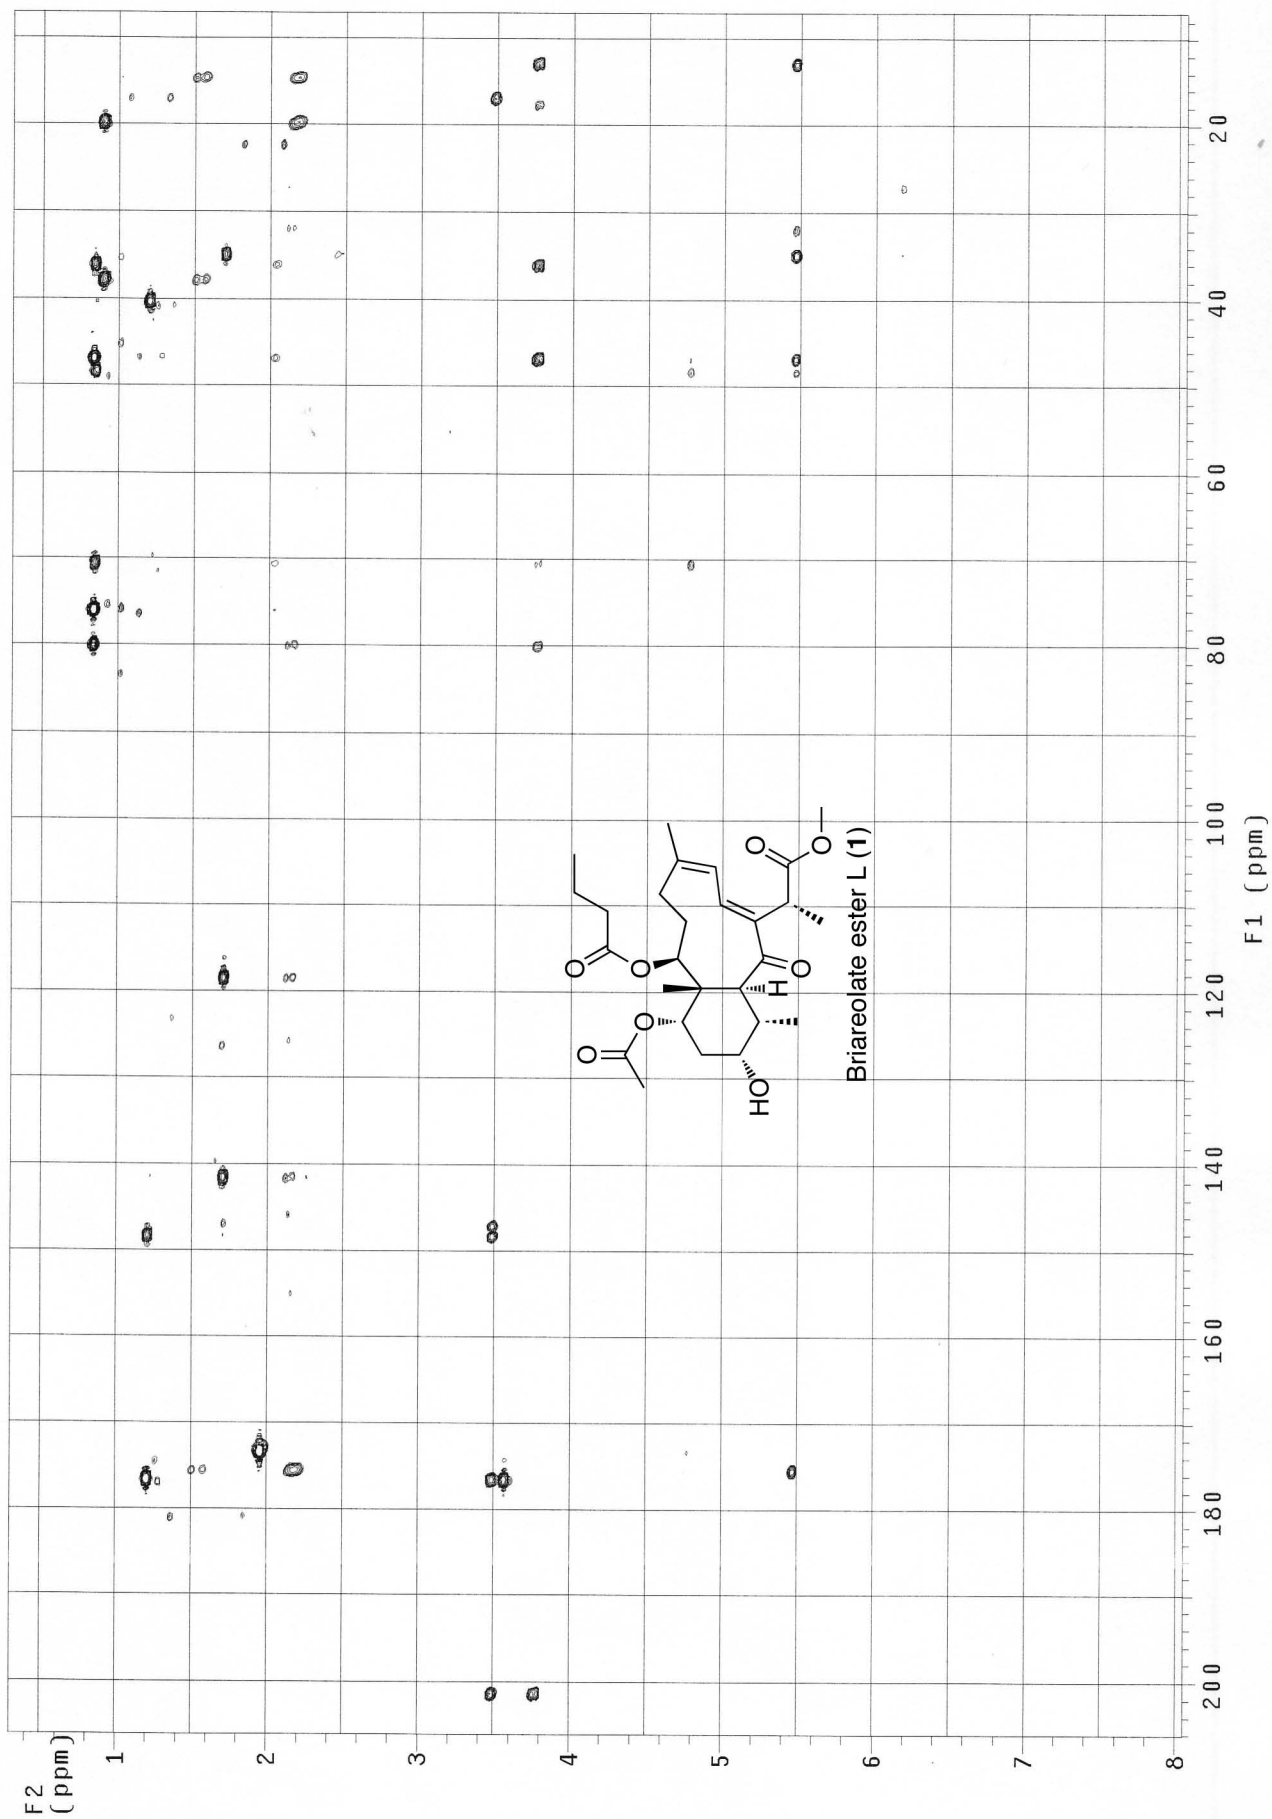

ROESY NMR spectrum of Briareolate ester L (1) (CD<sub>3</sub>OD, 500 MHz)

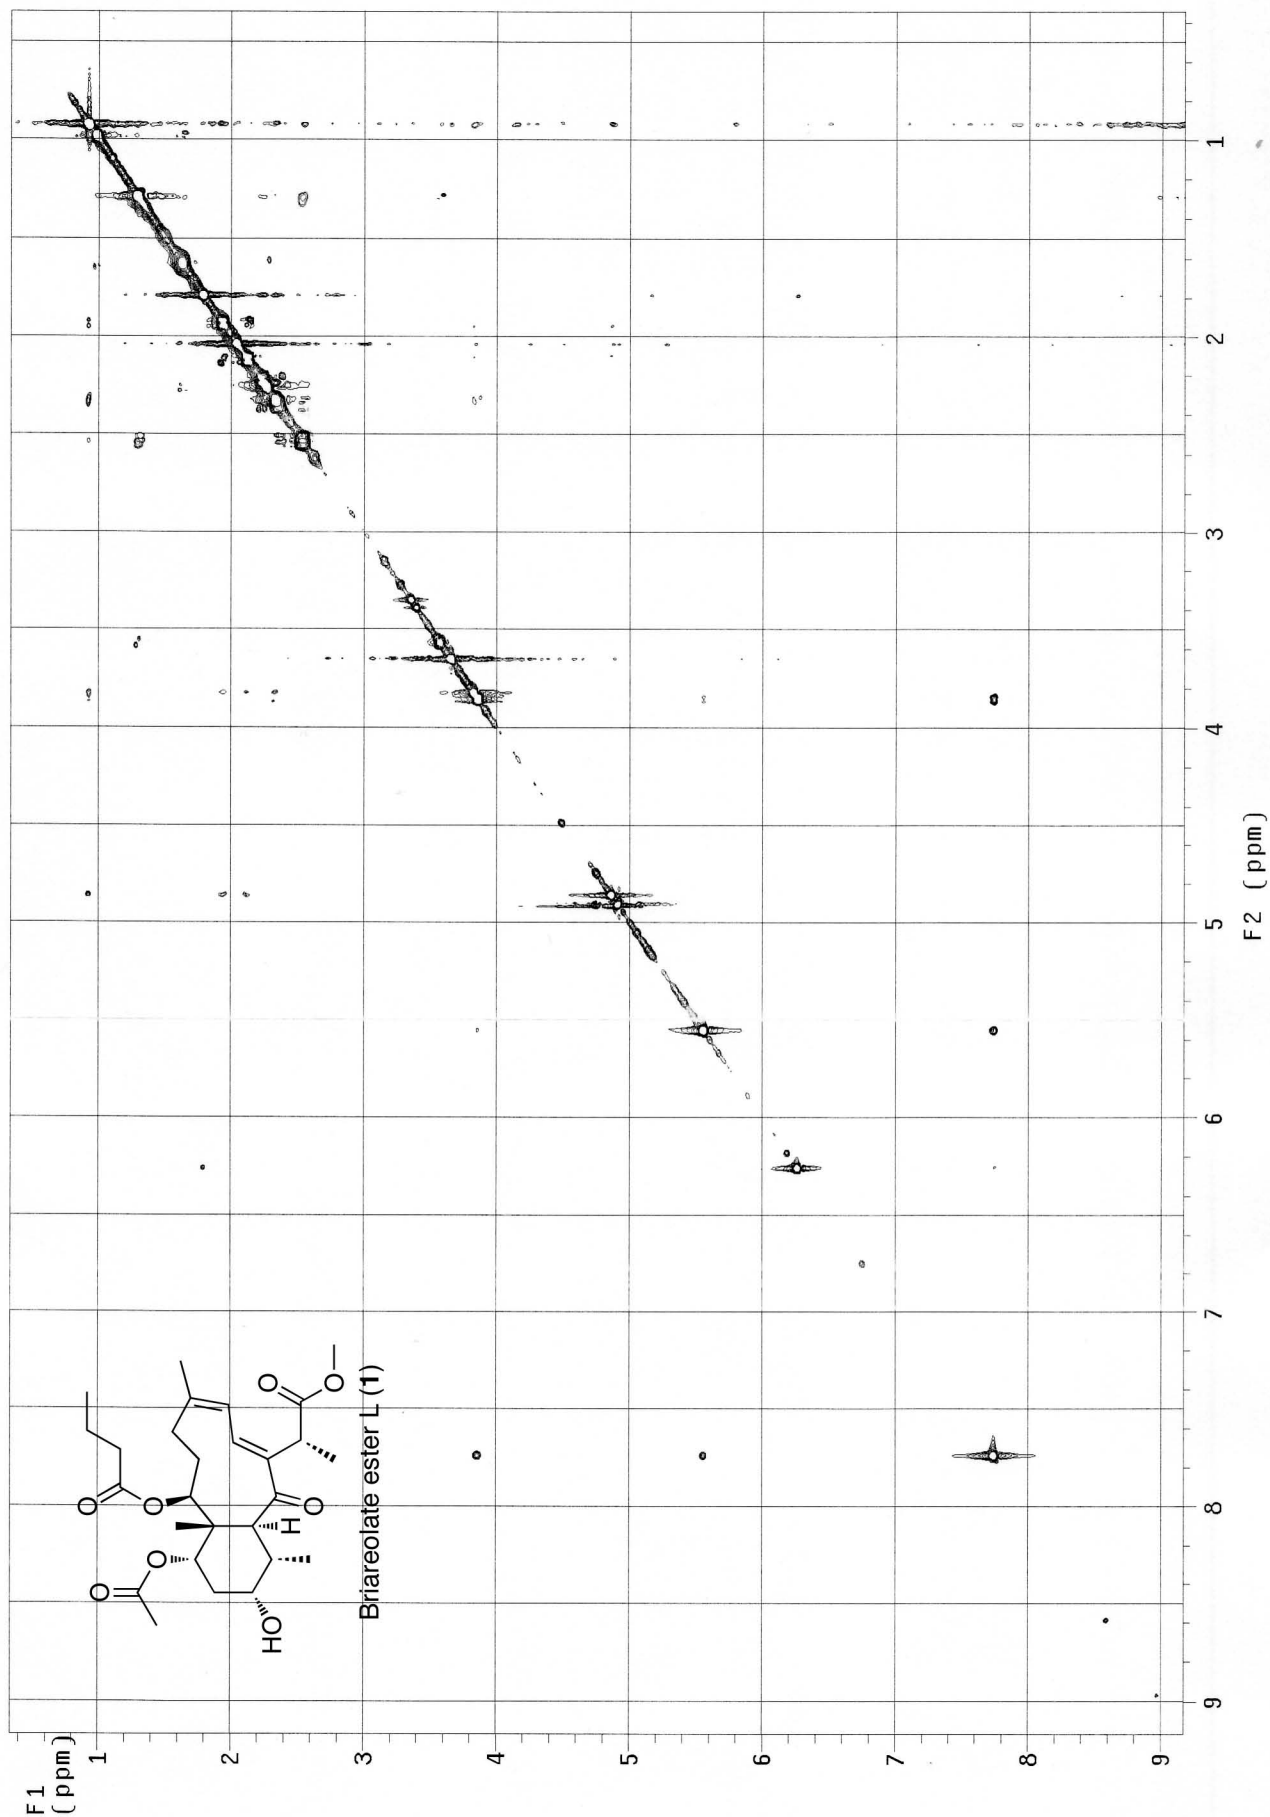

$^1\text{H}$  NMR spectrum of Briareolate ester M (2) ( $\text{CDCl}_3$ , 500 MHz)

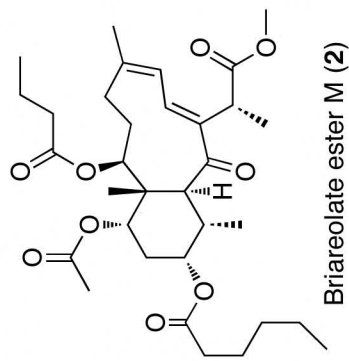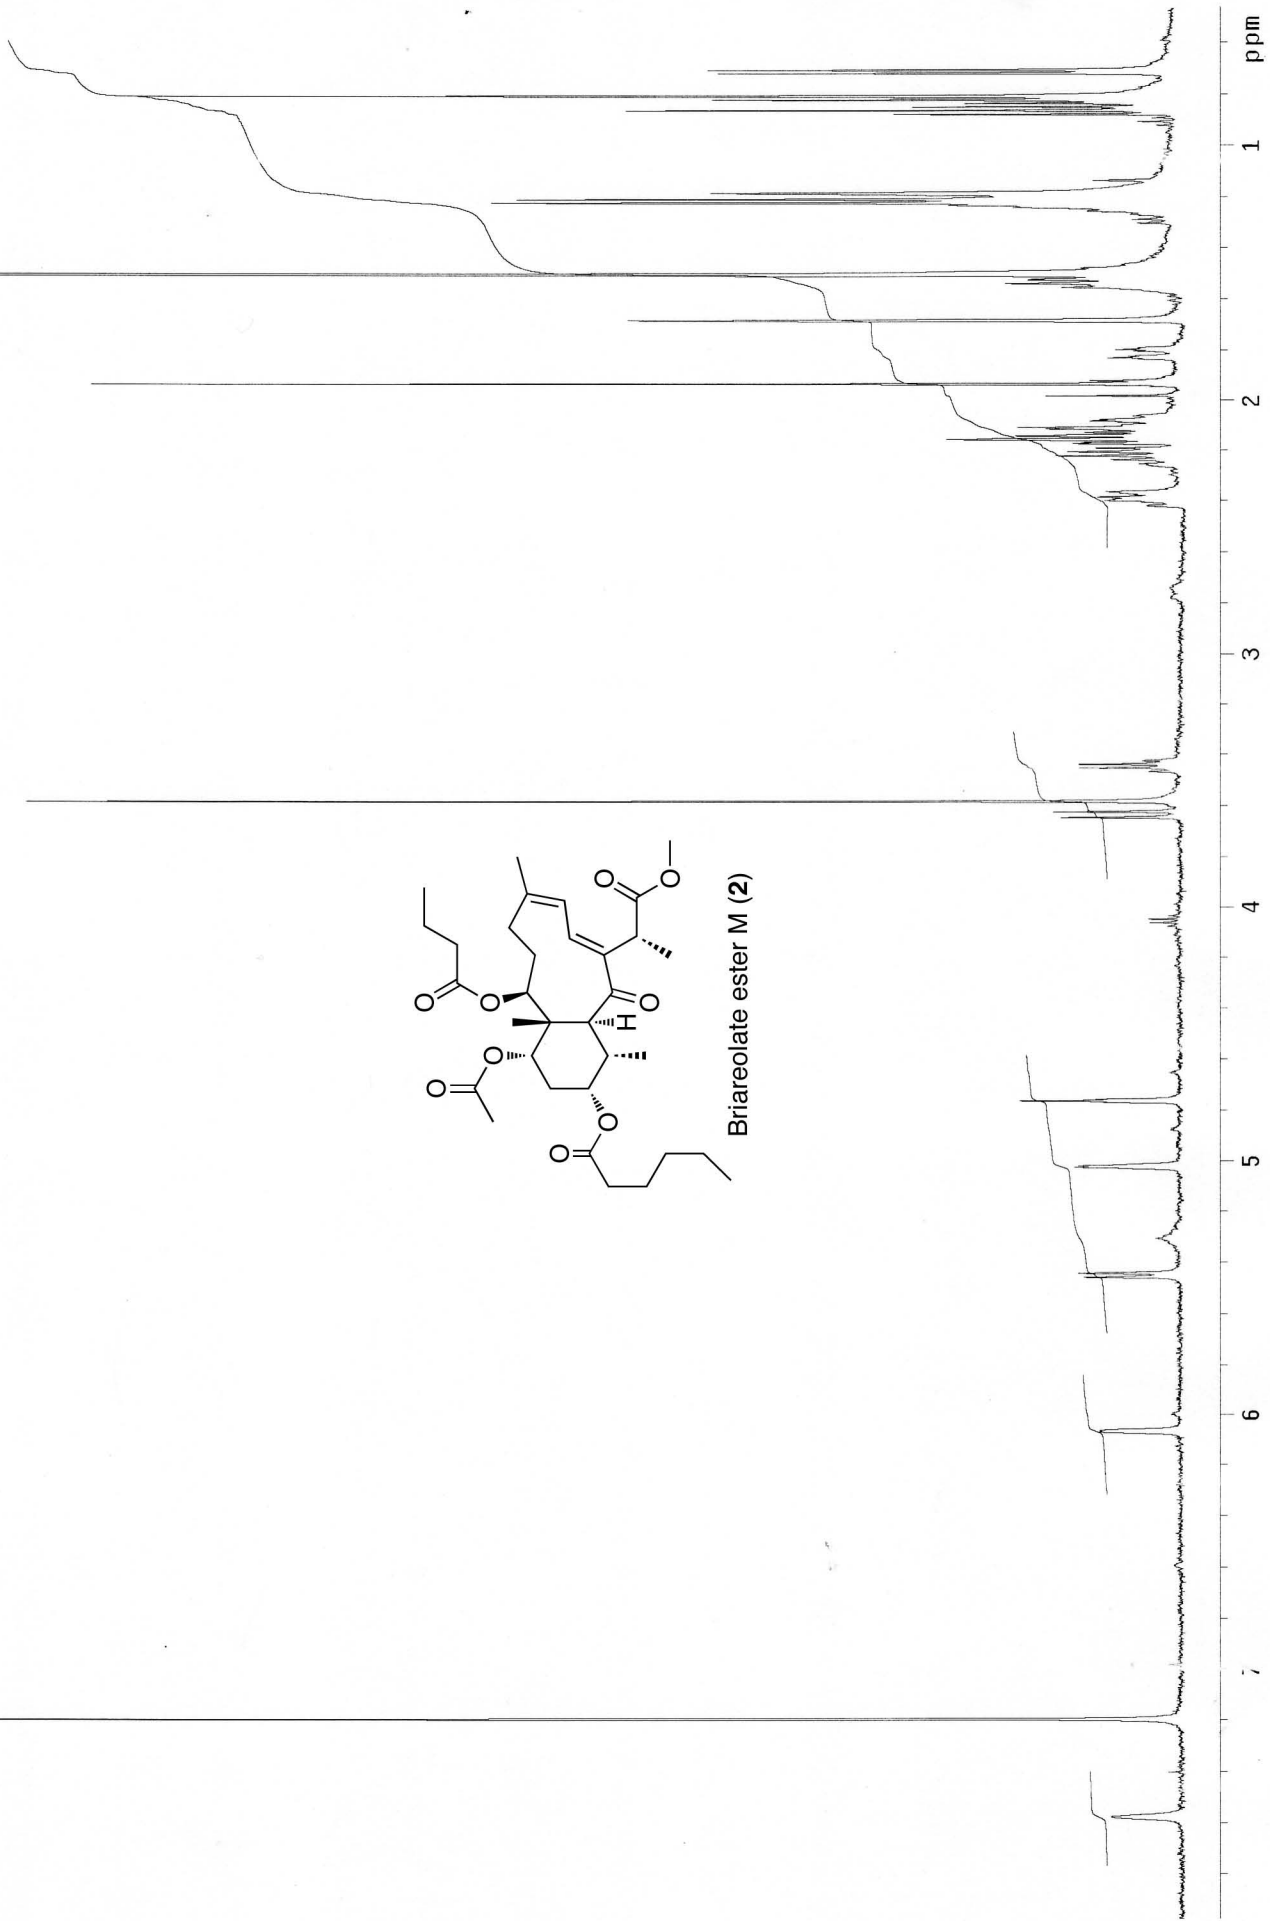

$^{13}\text{C}$  NMR spectrum of Briareolate ester M (2) ( $\text{CDCl}_3$ , 125 MHz)

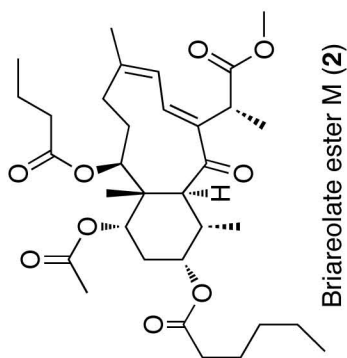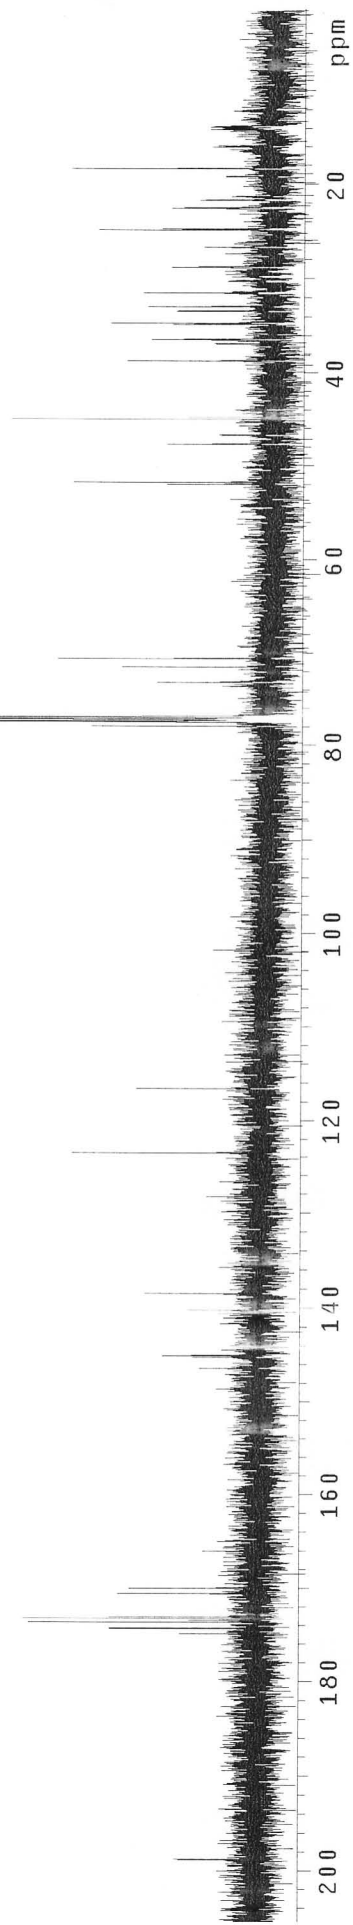

gCOSY NMR spectrum Briareolate ester M (2) (CDCl<sub>3</sub>, 500 MHz)

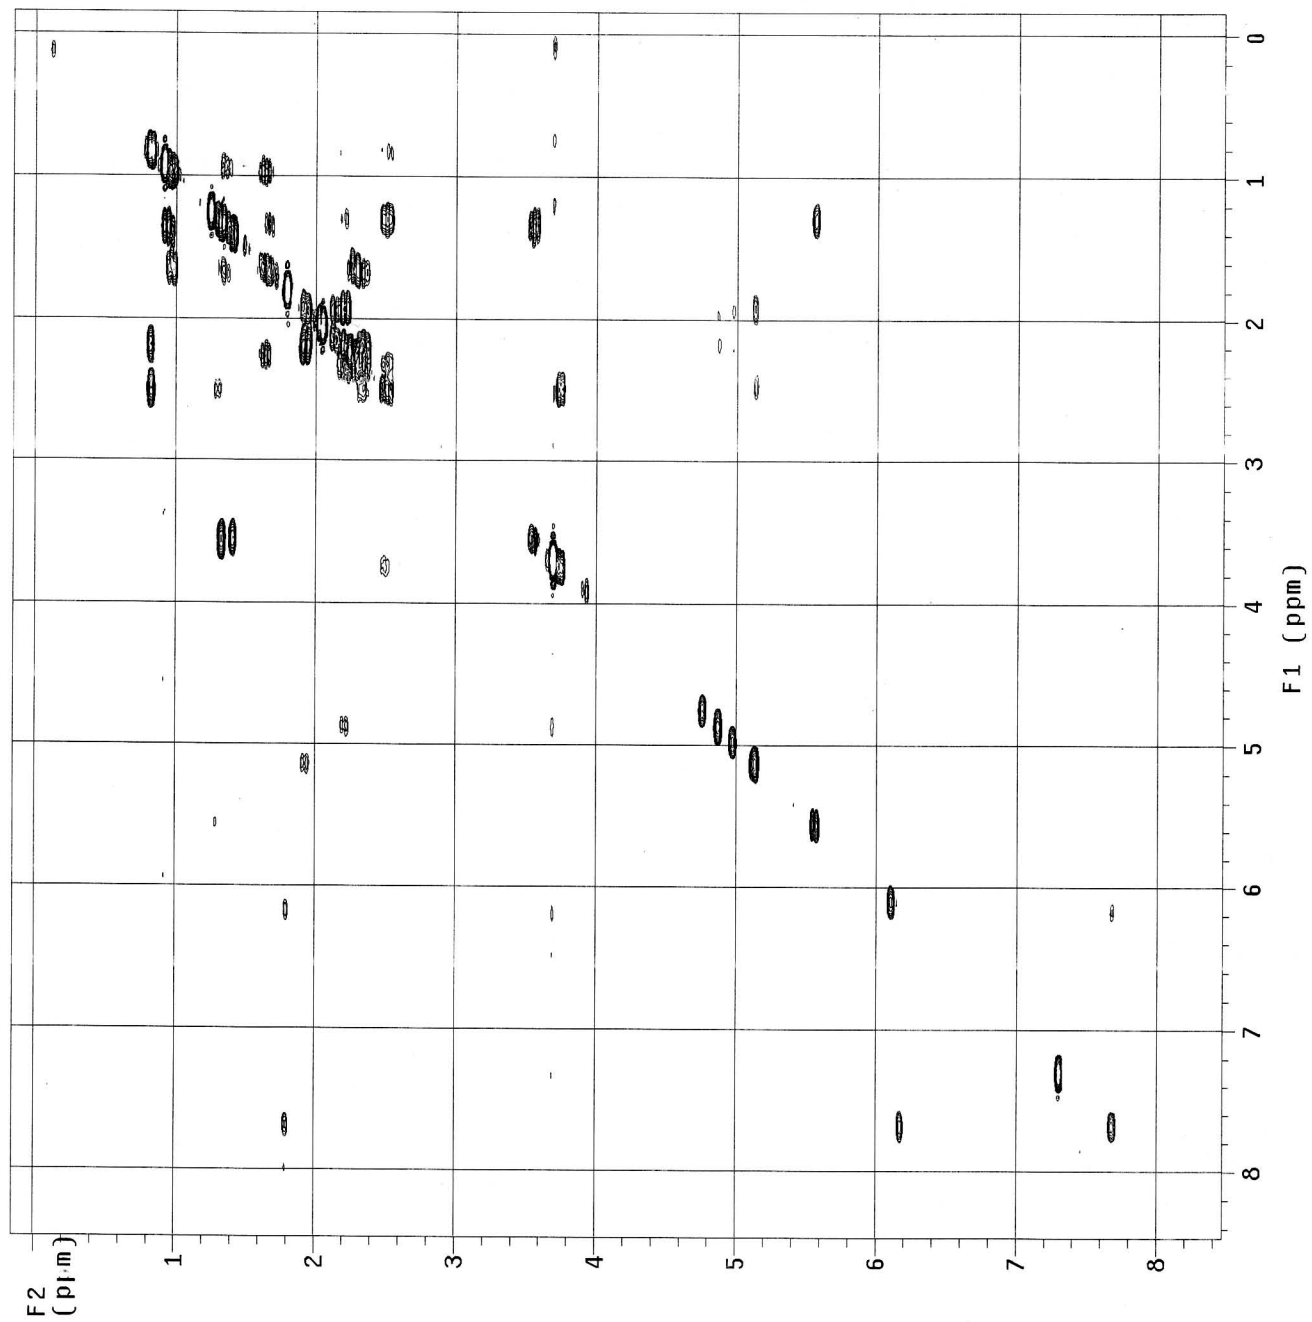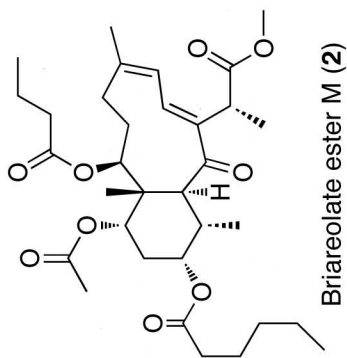

gHMBC NMR spectrum of Briareolate ester M (2) (CDCl<sub>3</sub>, 500 MHz)

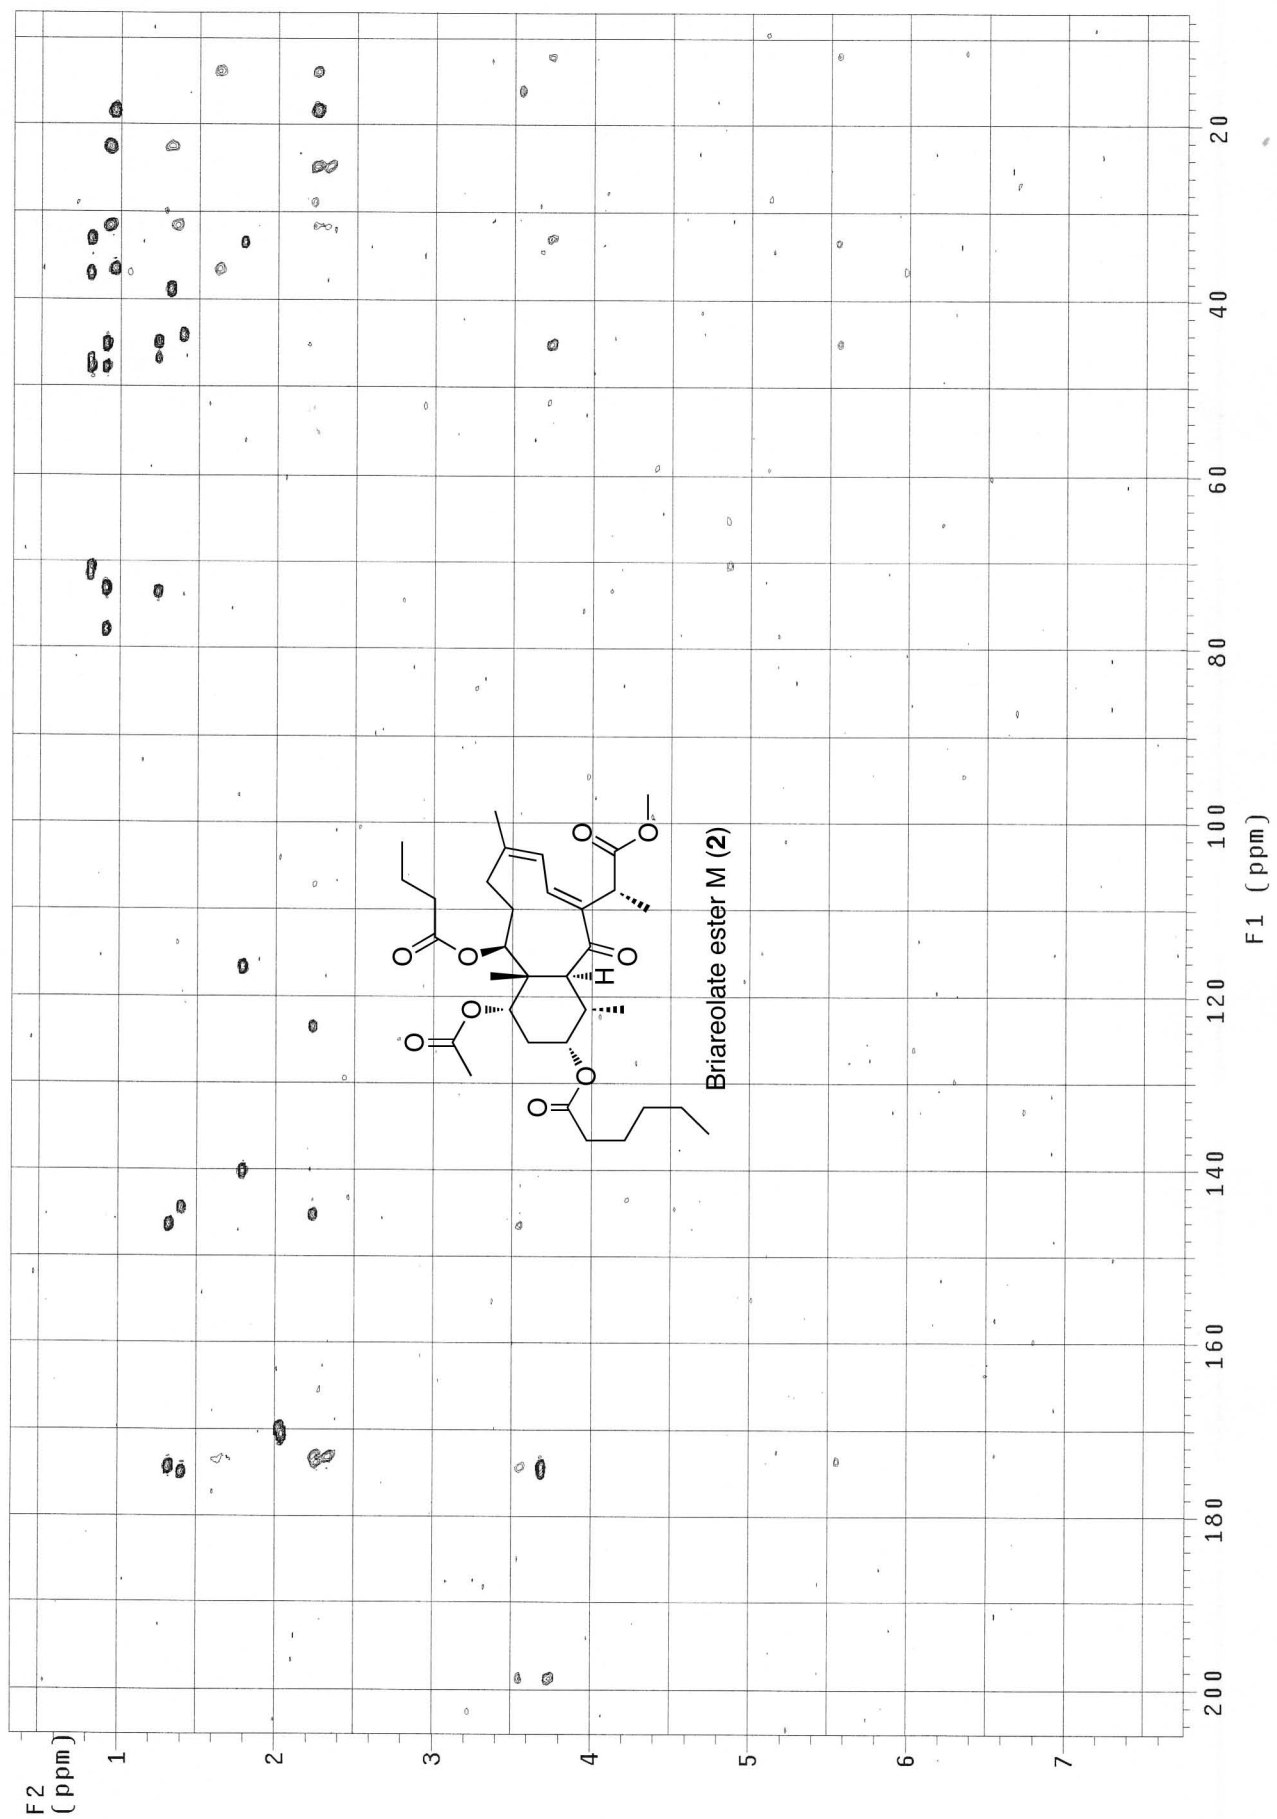



$^1\text{H}$  NMR spectrum of Briareolate ester N (3) ( $\text{CDCl}_3$ , 500 MHz)

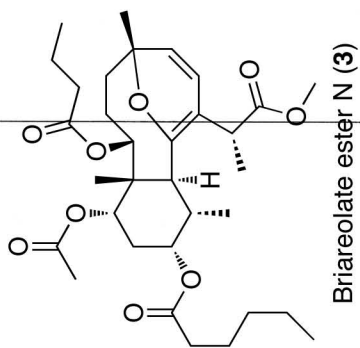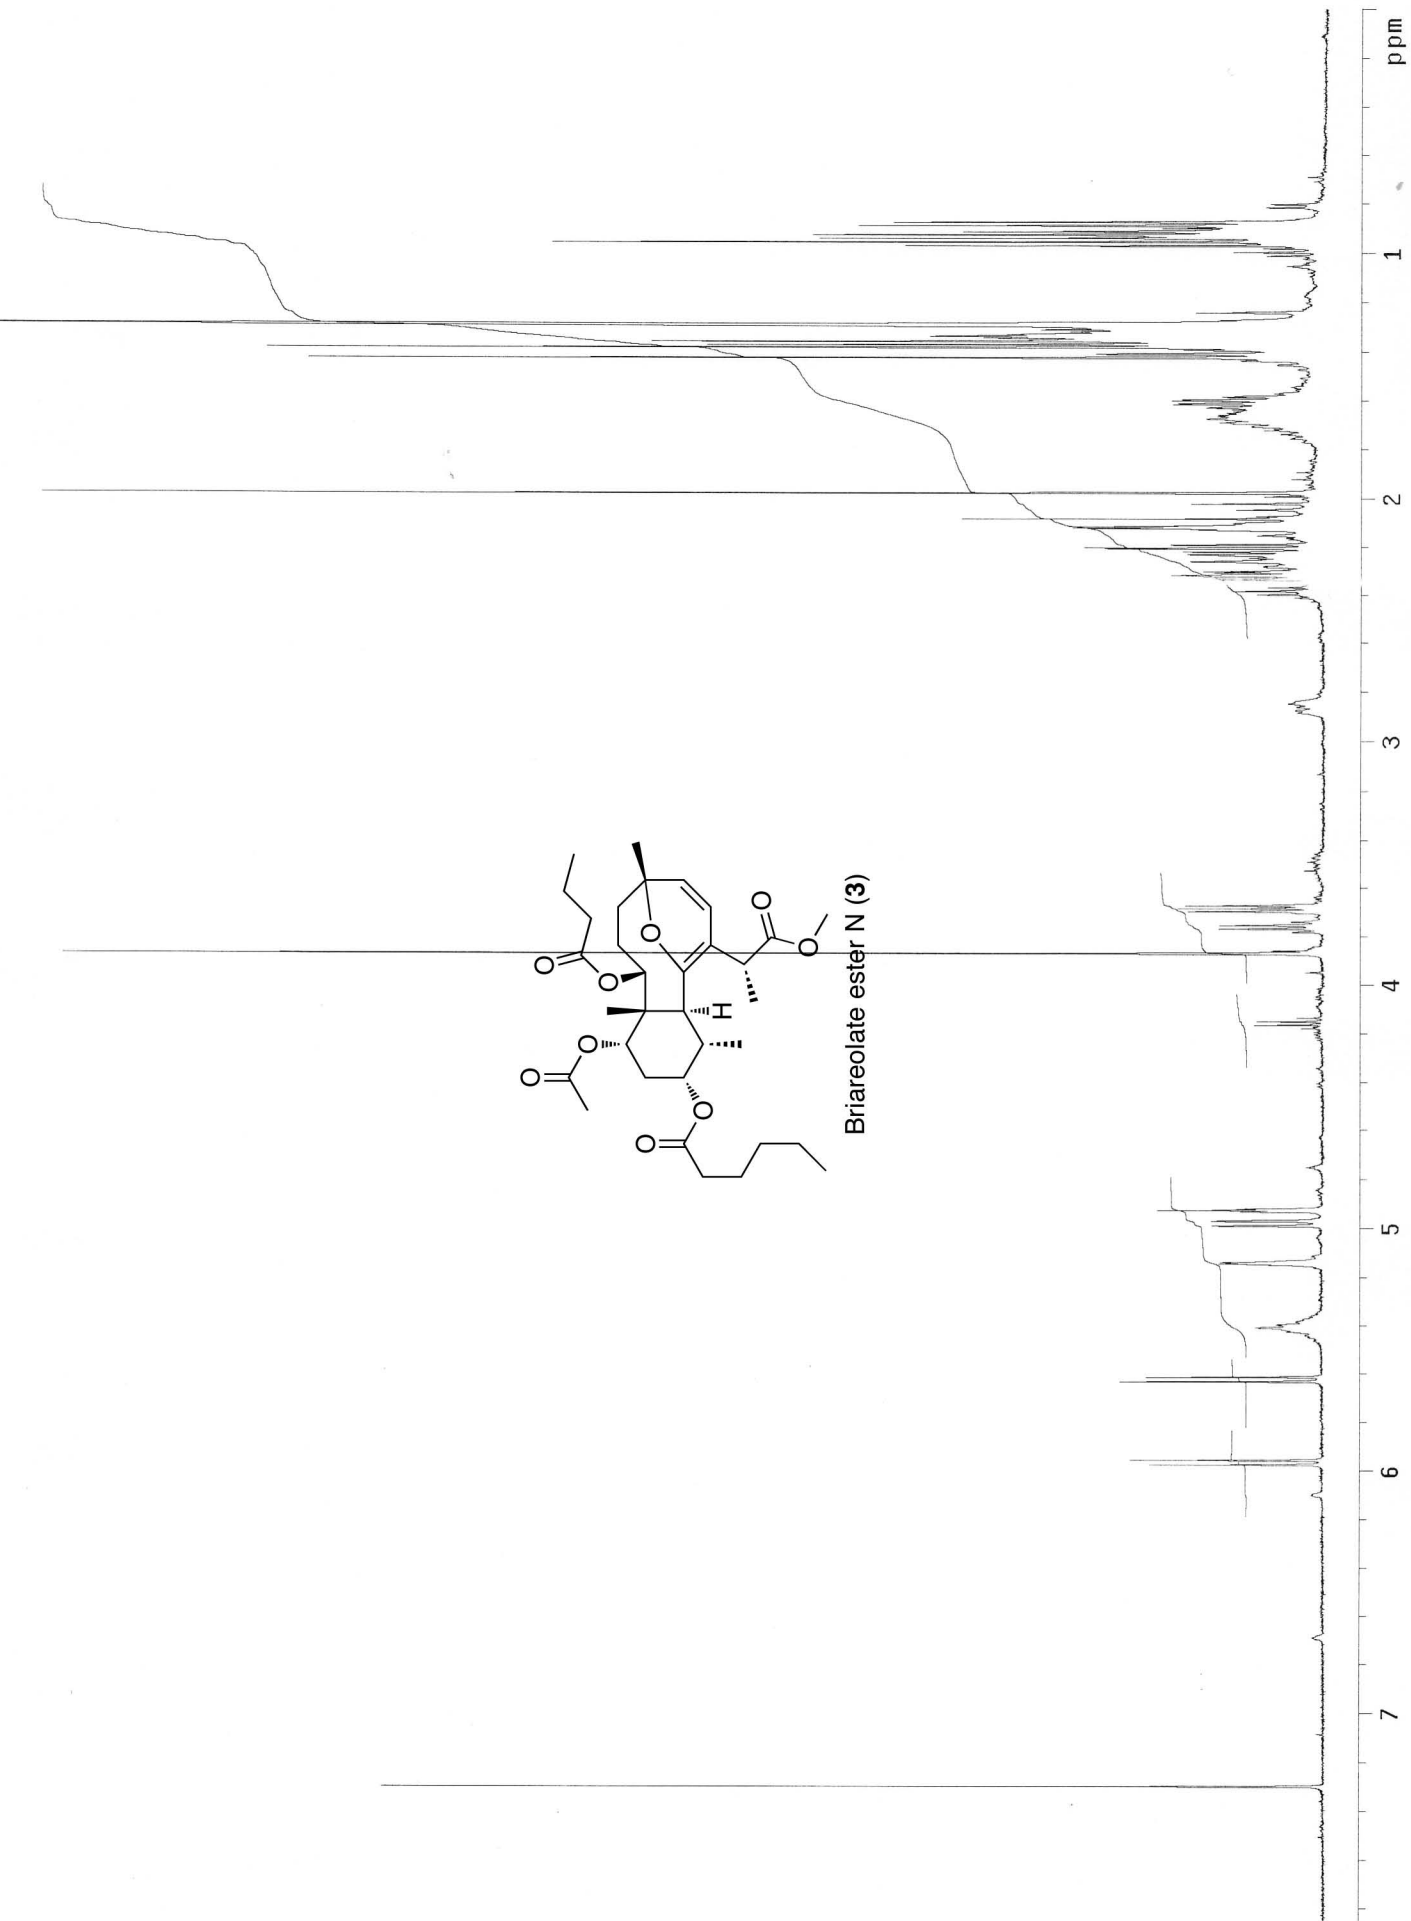

$^{13}\text{C}$  NMR spectrum of Briareolate ester N (3) ( $\text{CDCl}_3$ , 125 MHz)

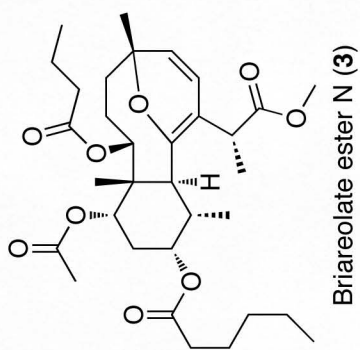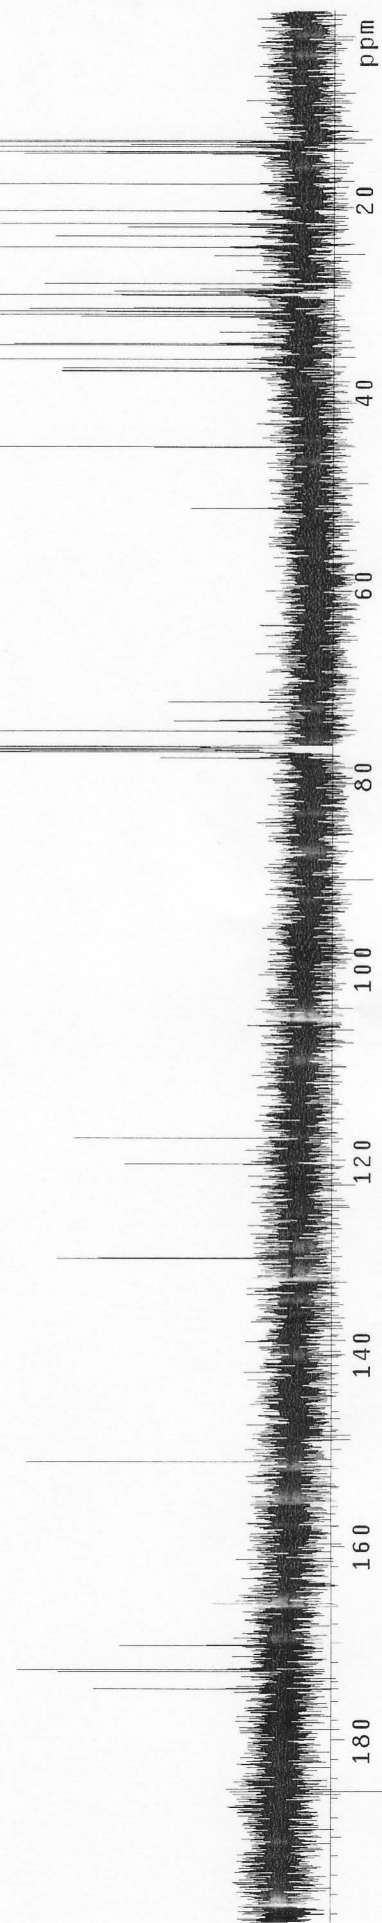

gCOSY NMR spectrum Briareolate ester N (3) (CDCl<sub>3</sub>, 500 MHz)

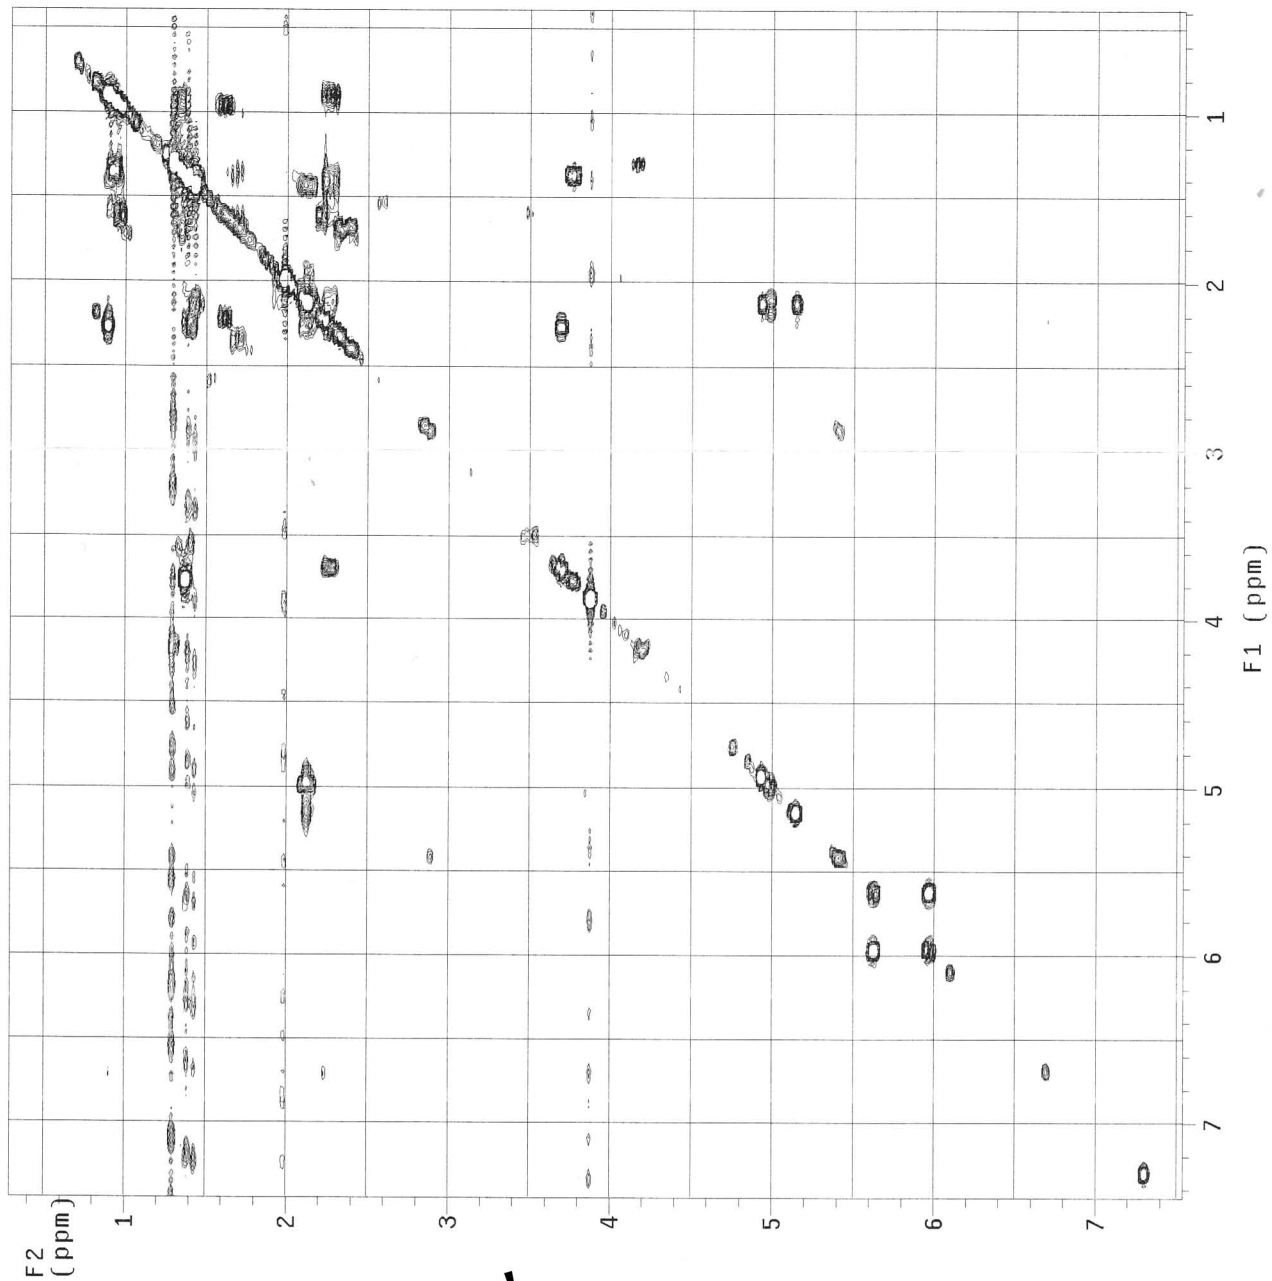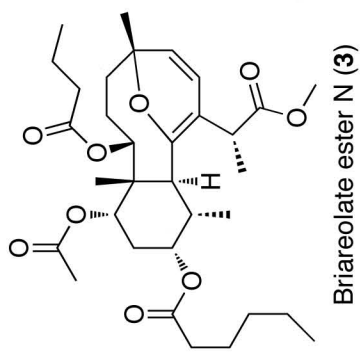

gHSQC NMR spectrum of Briareolate ester N (3) (CDCl<sub>3</sub>, 500 MHz)

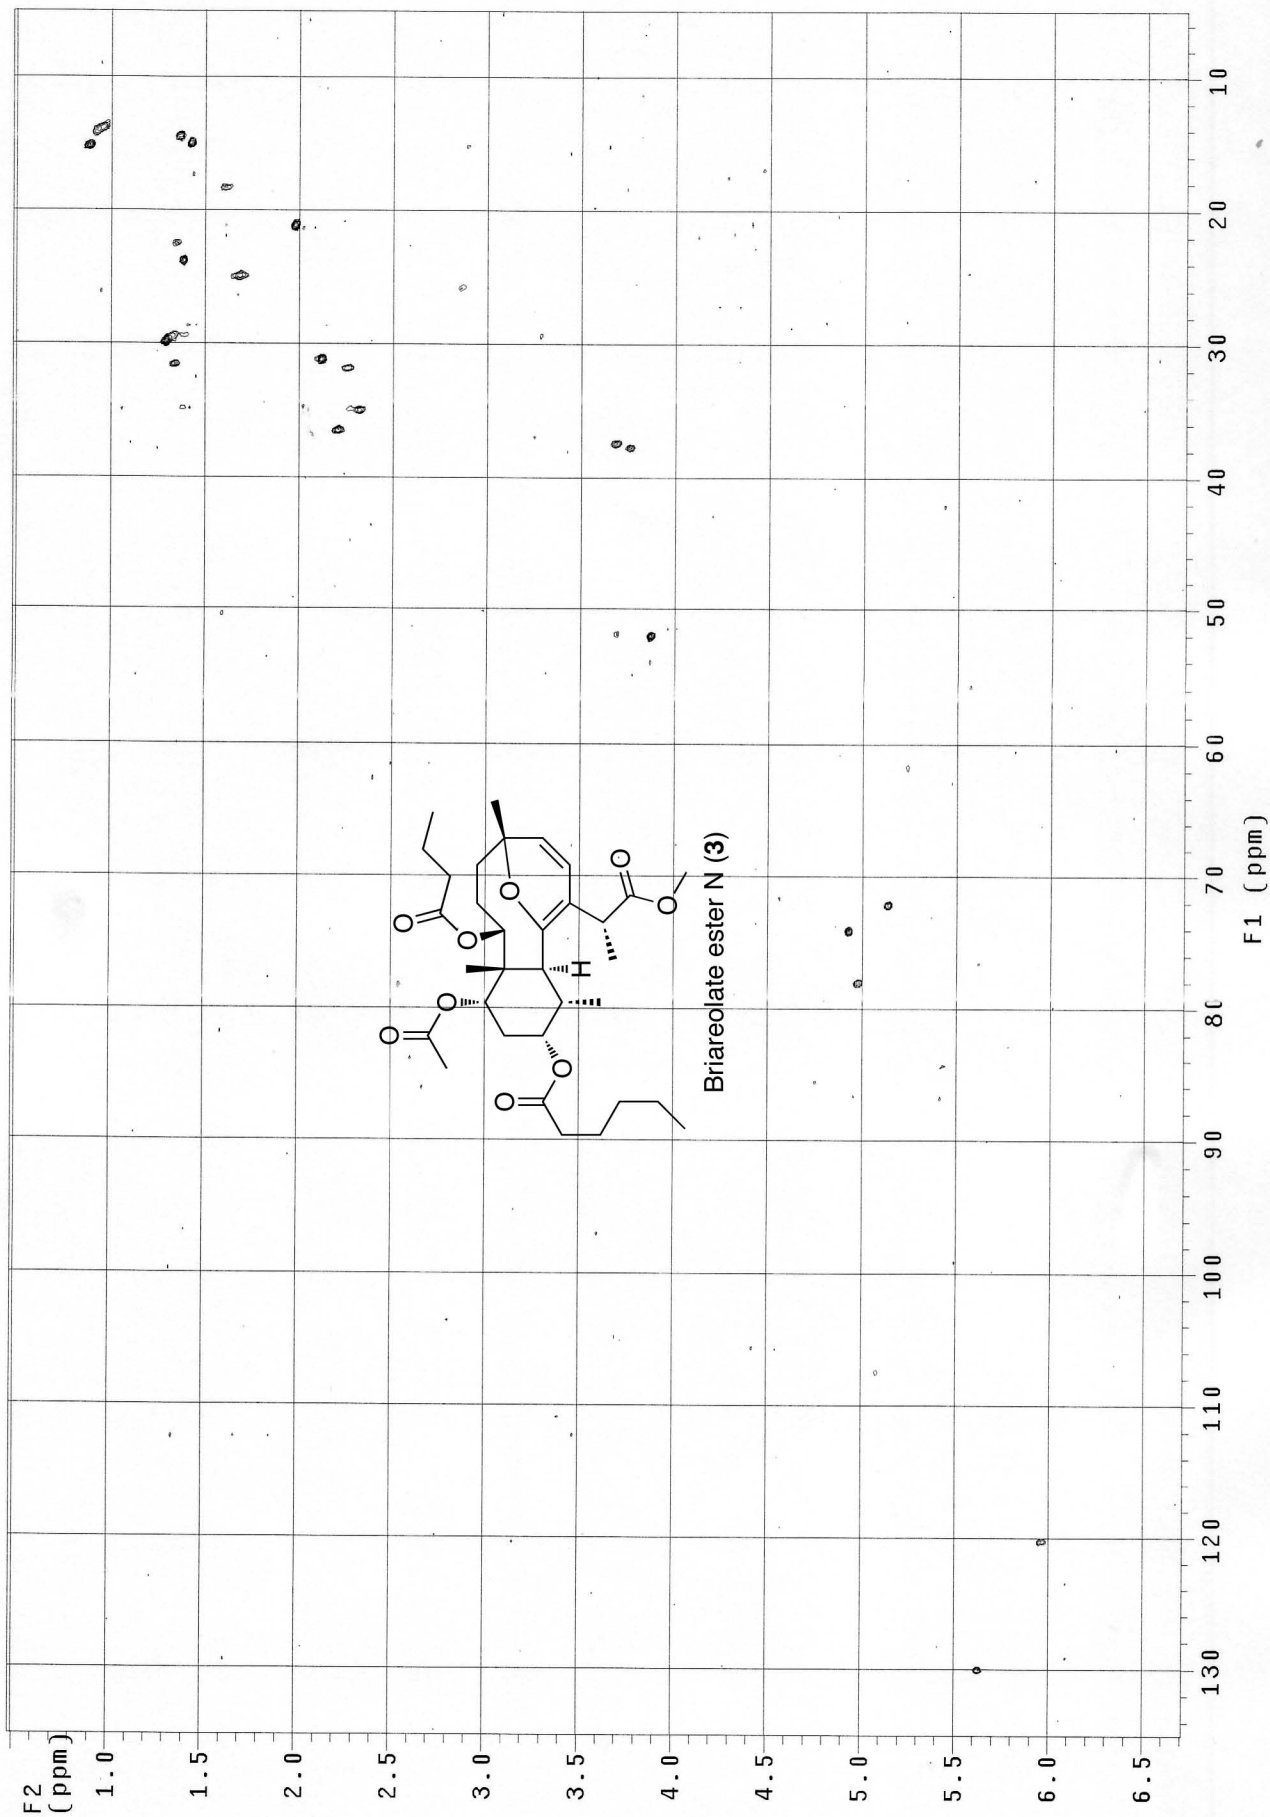

gHMBC NMR spectrum of Briareolate ester N (3) (CDCl<sub>3</sub>, 500 MHz)

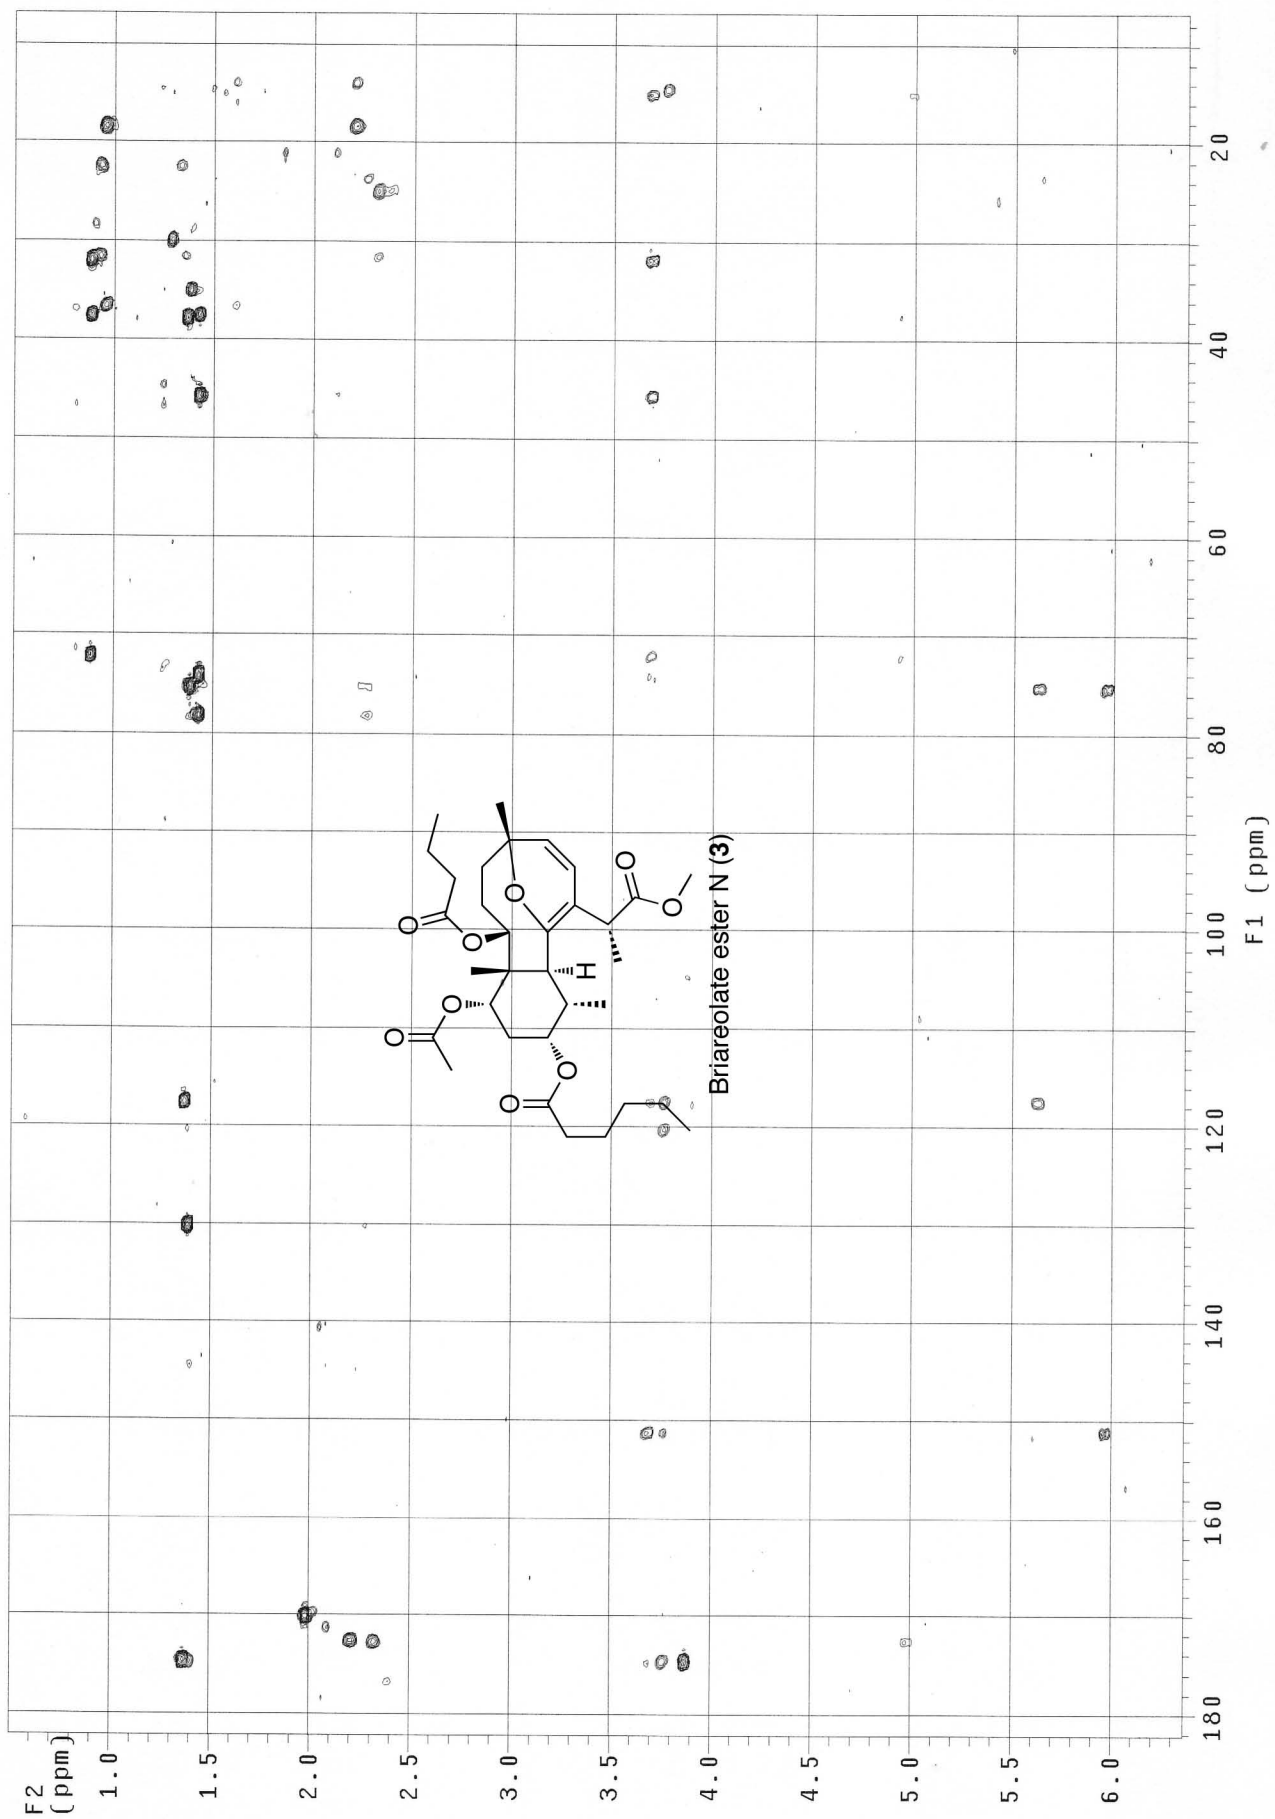

$^1\text{H}$  NMR spectrum of thiophenol addition product (**7a-SPh**) ( $\text{CD}_3\text{OD}$ , 400 MHz)

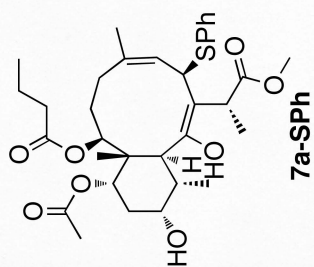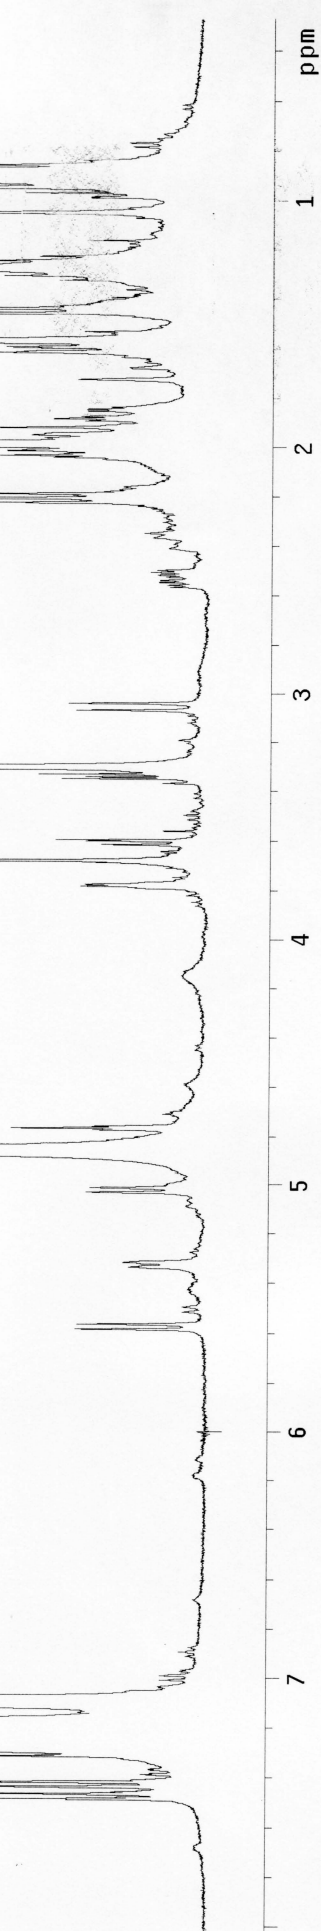

$^{13}\text{C}$  NMR spectrum of thiophenol addition product (**7a-SPH**) ( $\text{CD}_3\text{OD}$ , 100 MHz)

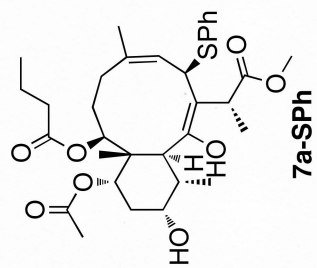

**7a-SPH**

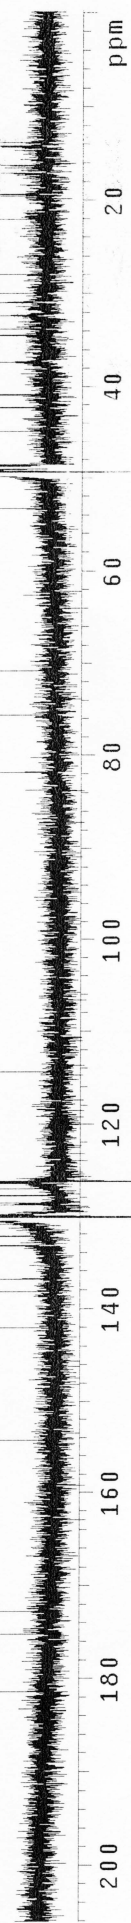



gCOSY NMR spectrum of thiophenol addition product (7a-SPh) (CD<sub>3</sub>OD, 400 MHz)

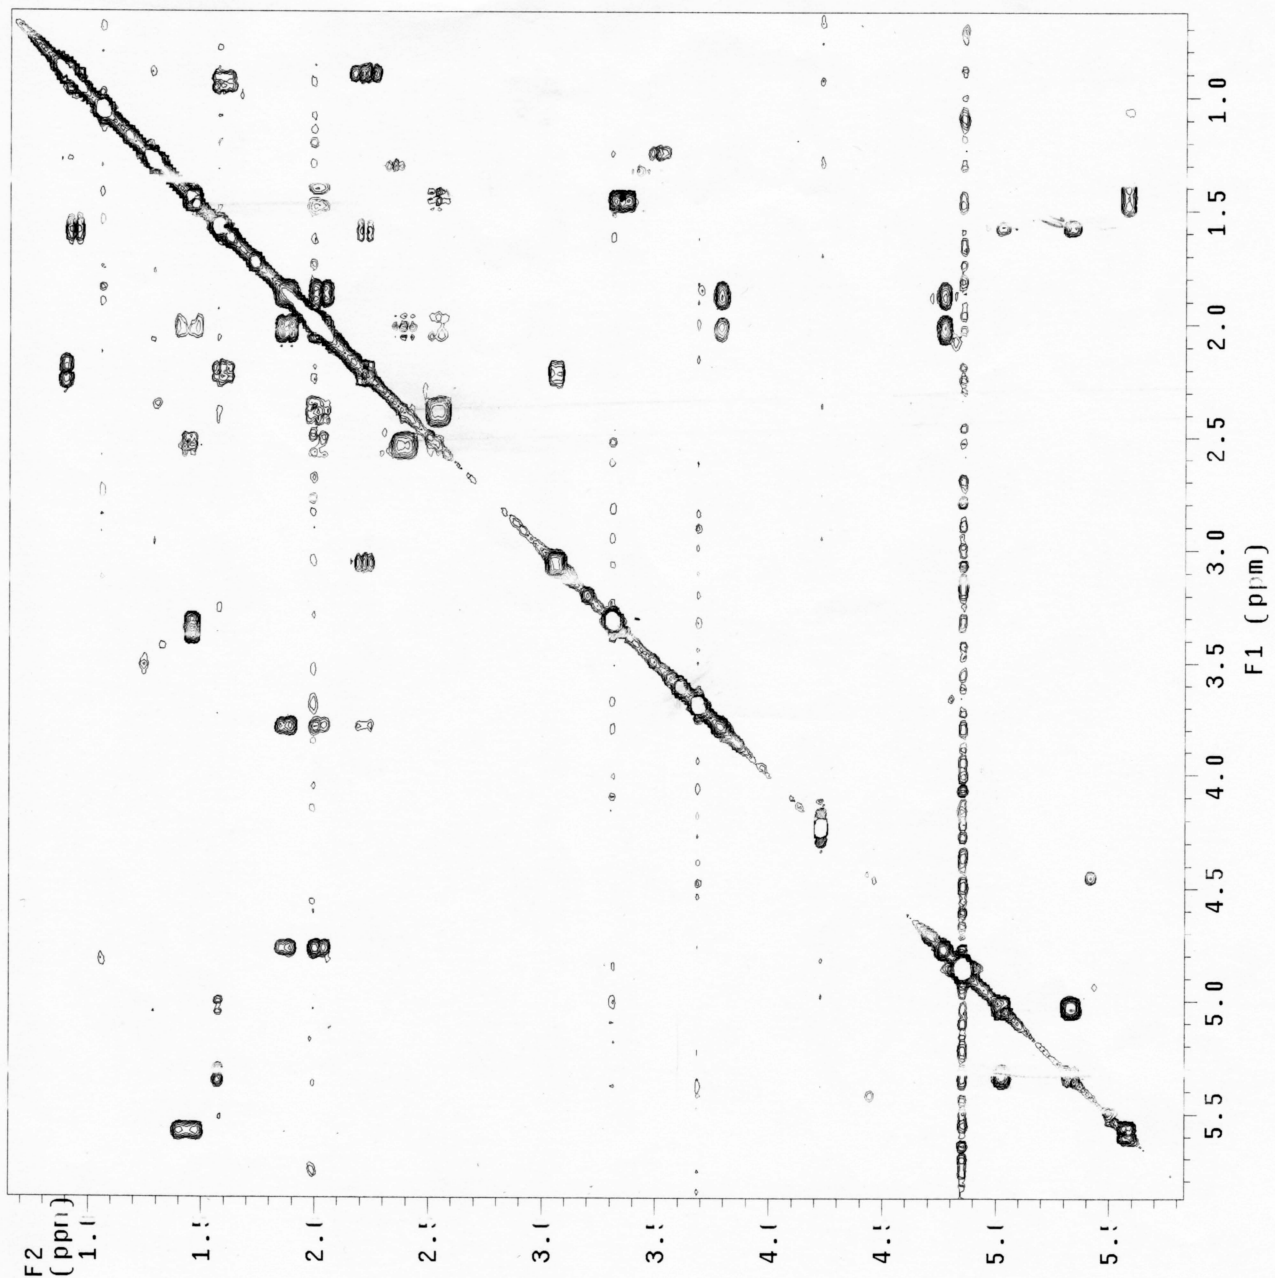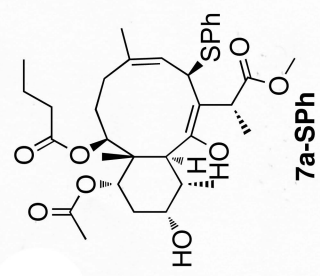



gHMBC NMR spectrum of thiophenol addition product (7a-SPh) (CD<sub>3</sub>OD, 400 MHz)

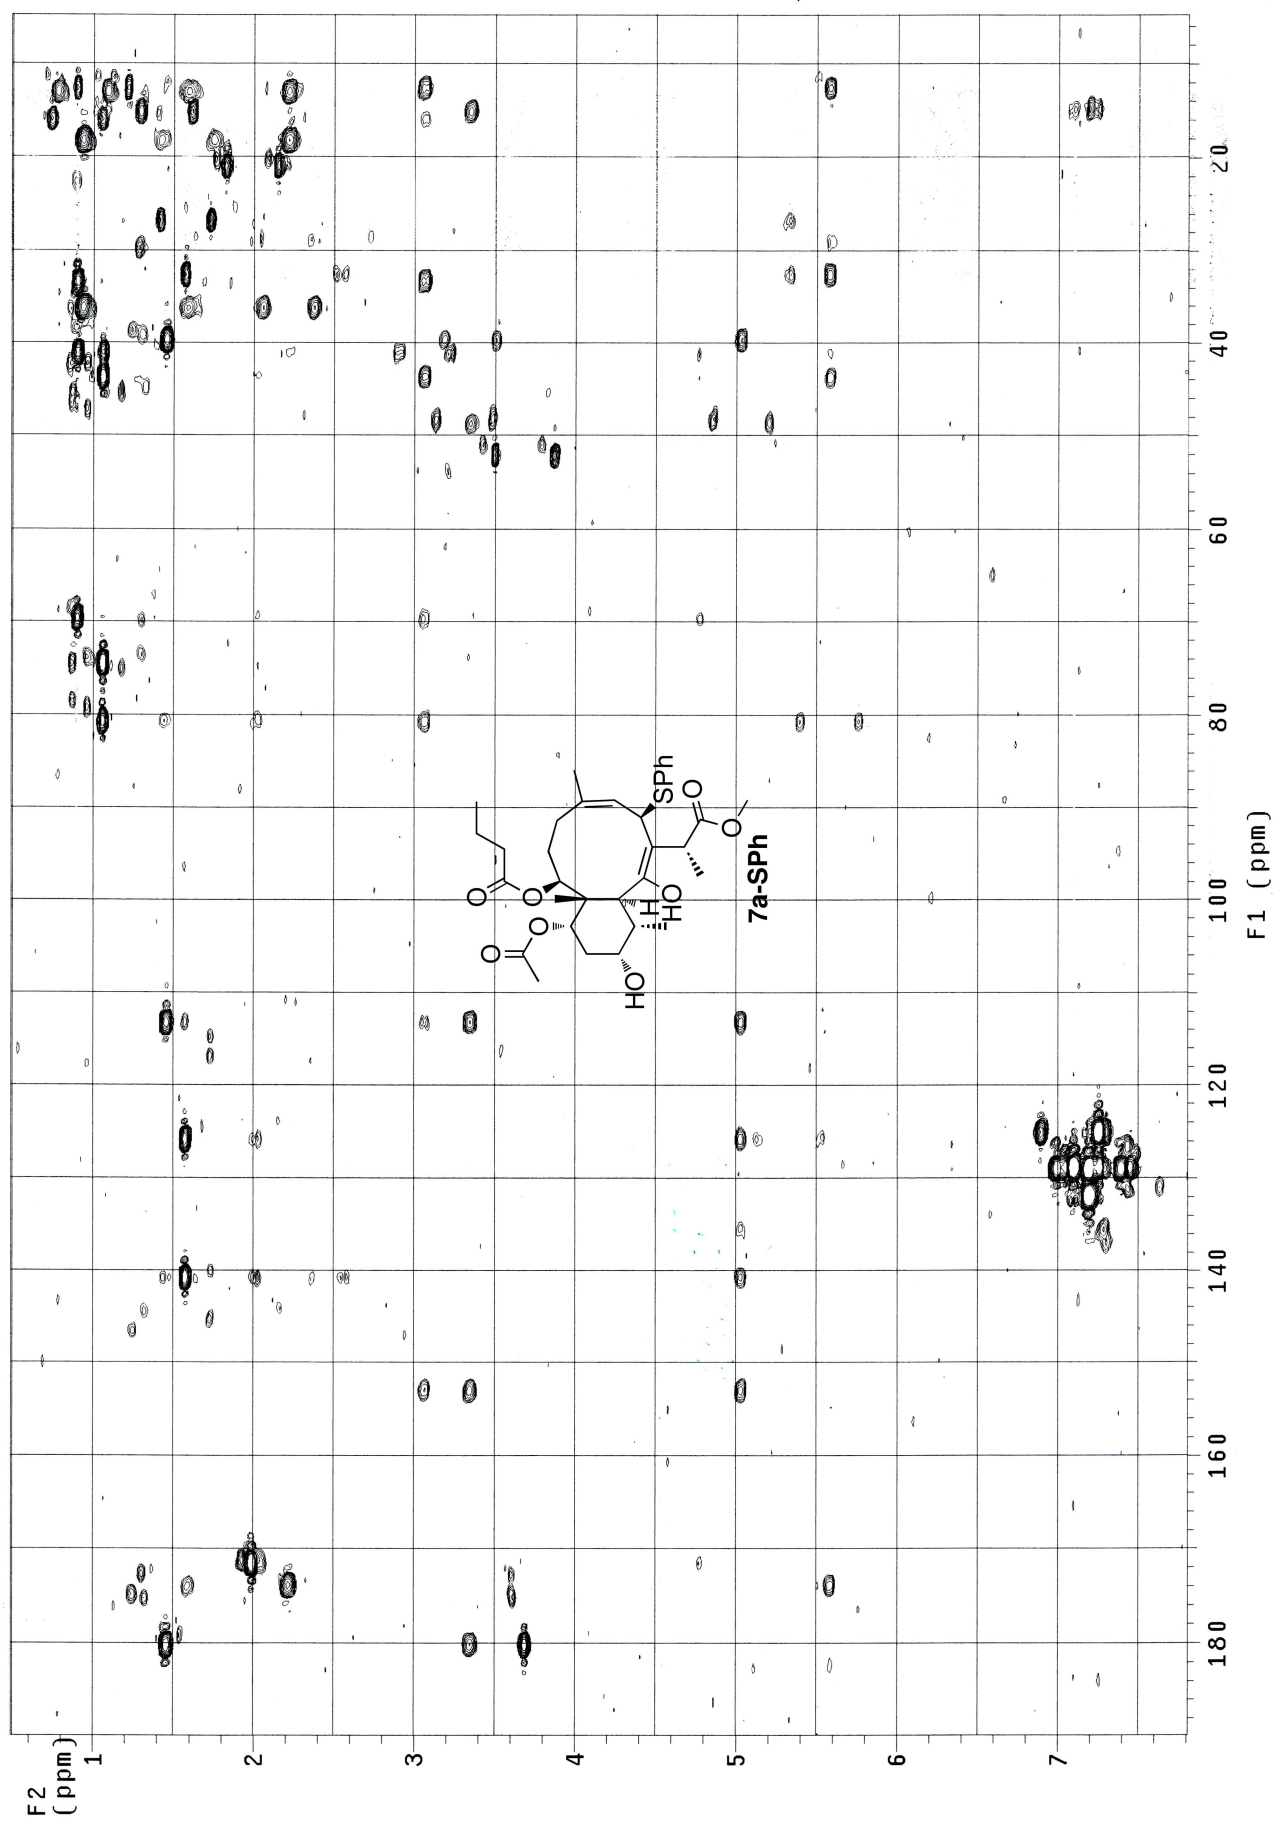

<sup>1</sup>H NMR spectrum of L-Cys-OMe addition product (7b- L-Cys-OMe) (CD<sub>3</sub>OD, 400 MHz)

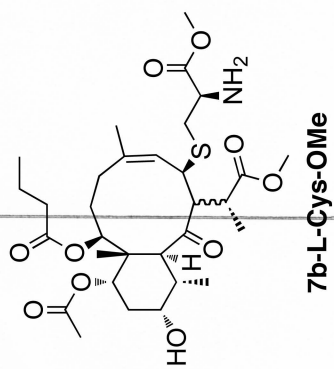

S38

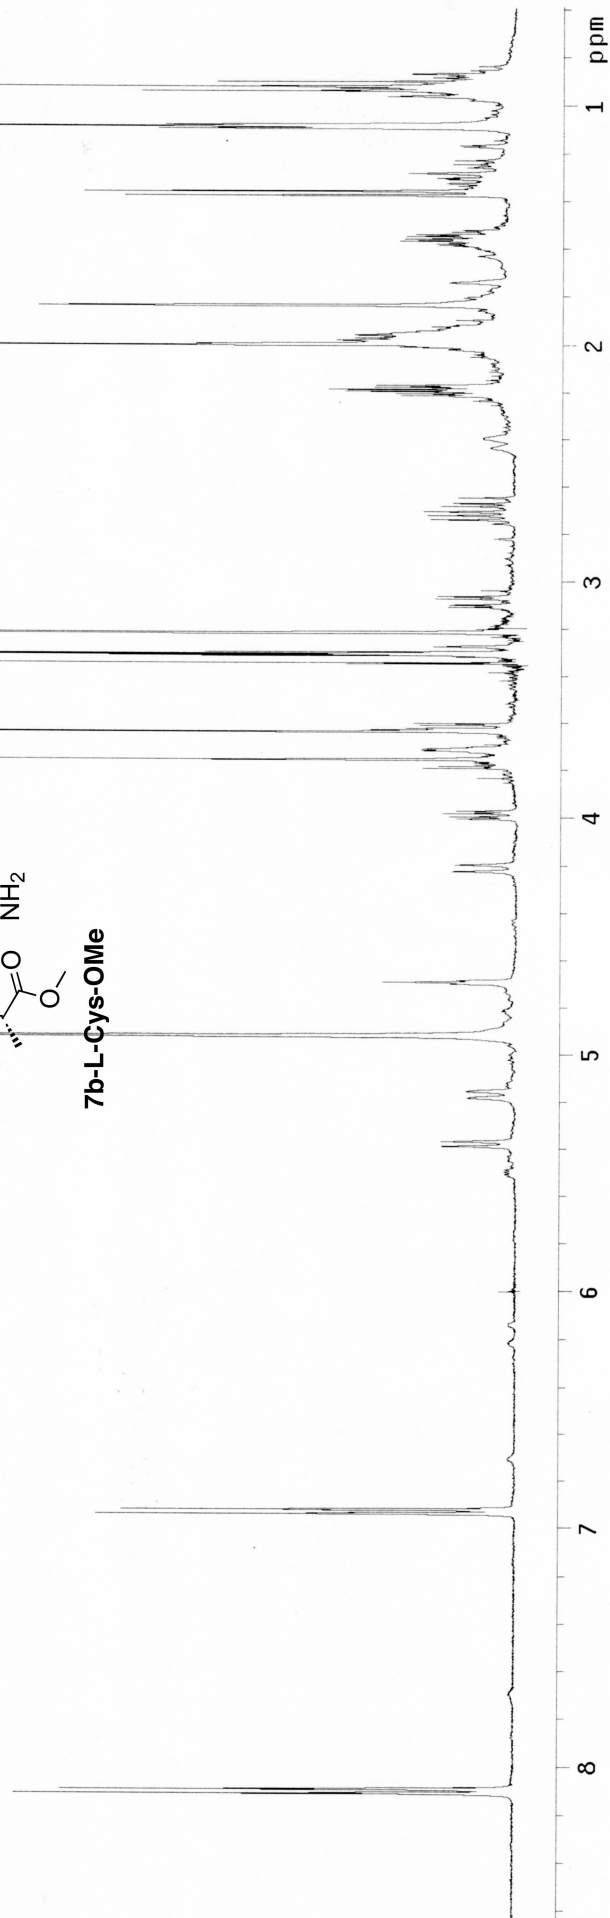

$^{13}\text{C}$  NMR spectrum of L-Cys-OMe addition product (**7b-L-Cys-OMe**) ( $\text{CD}_3\text{OD}$ , 100 MHz)

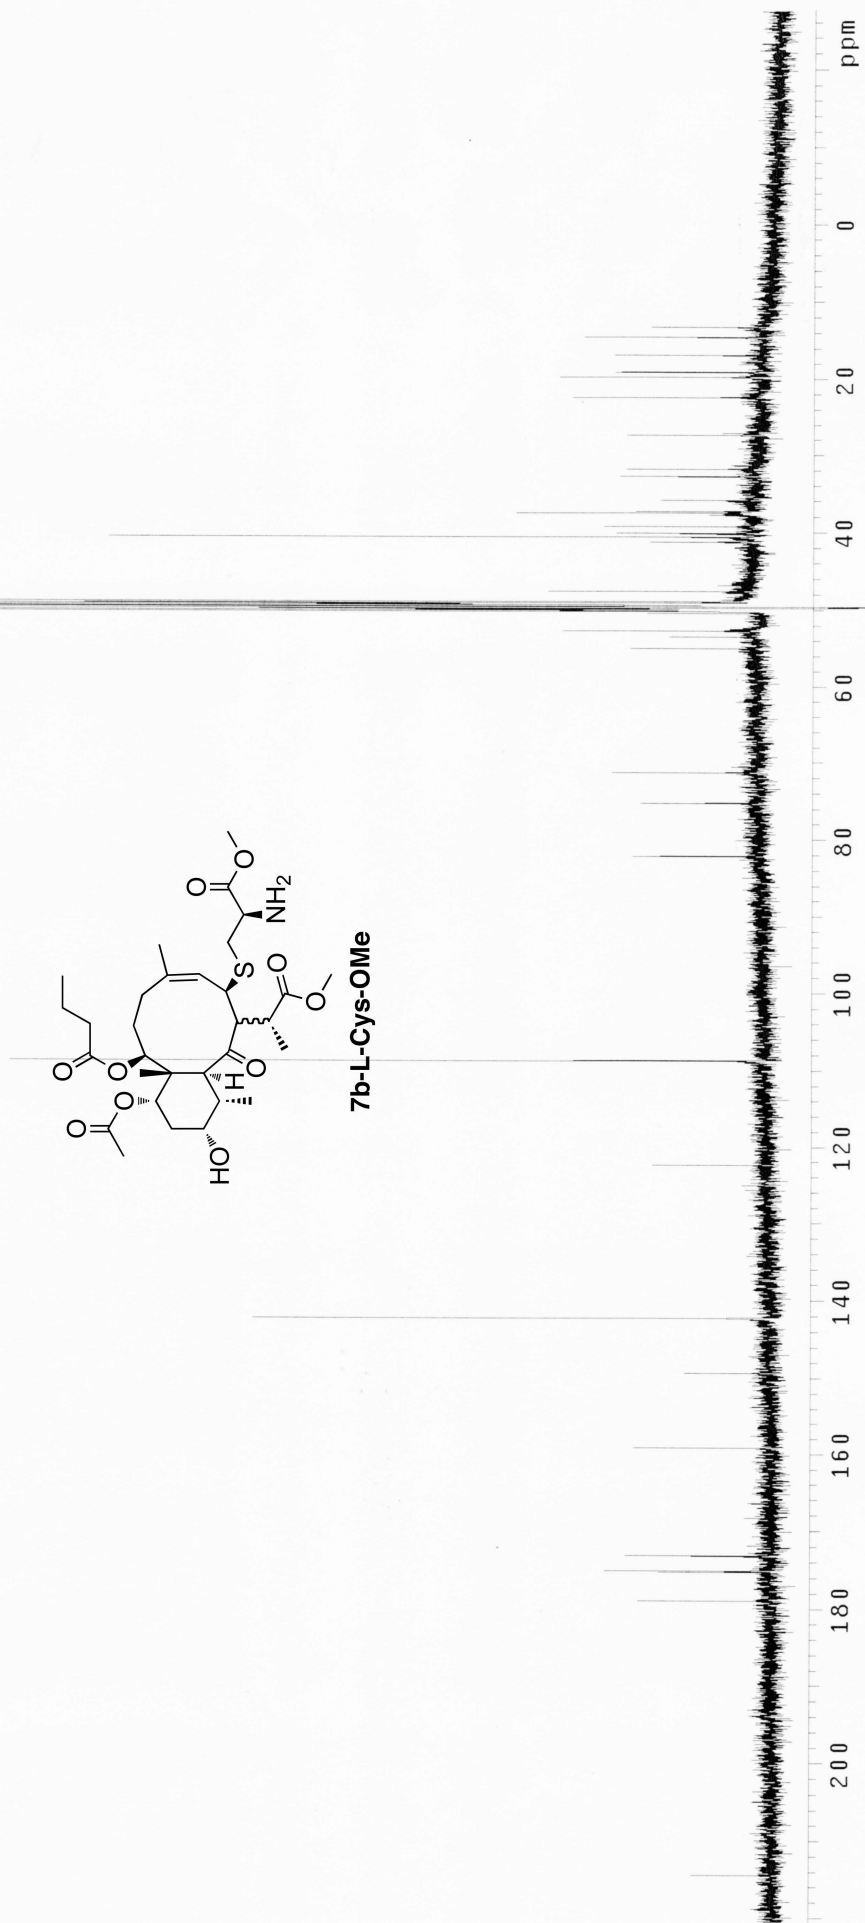

gCOSY NMR spectrum of L-Cys-OMe addition product (7b- L-Cys-OMe) (CD<sub>3</sub>OD, 400 MHz)

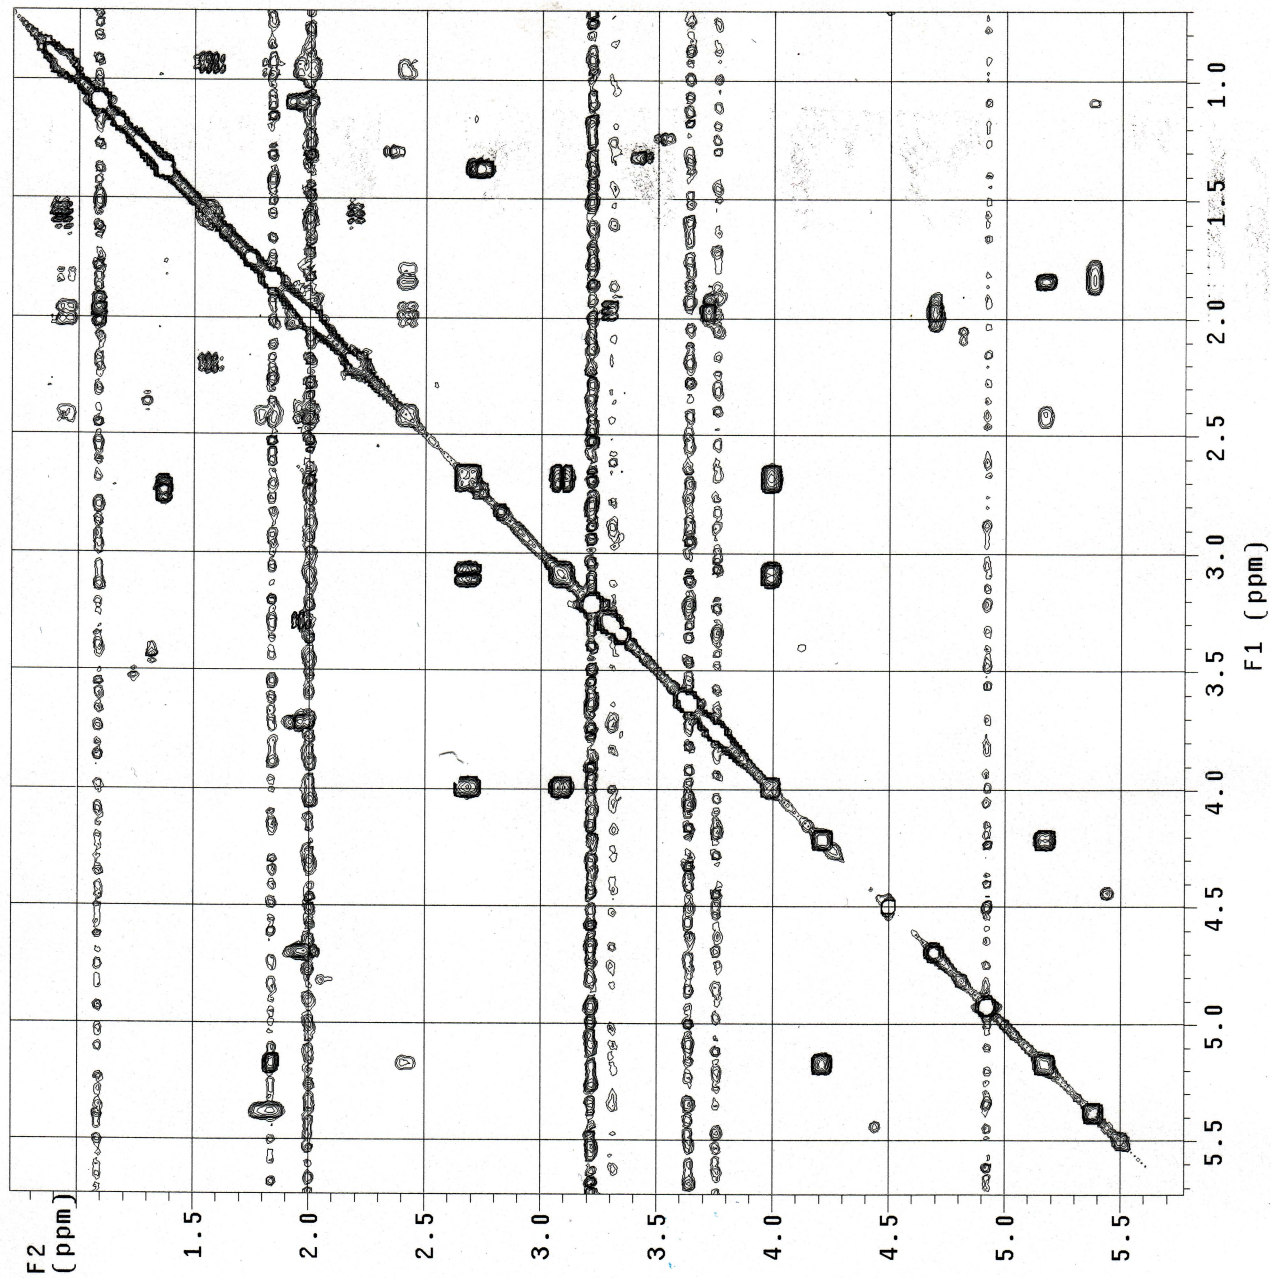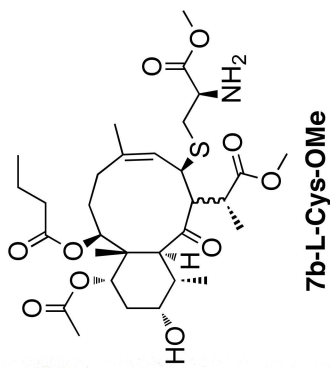

gHMBC NMR spectrum of L-Cys-OMe addition product (7b-L-Cys-OMe) (CD3OD, 400 MHz)

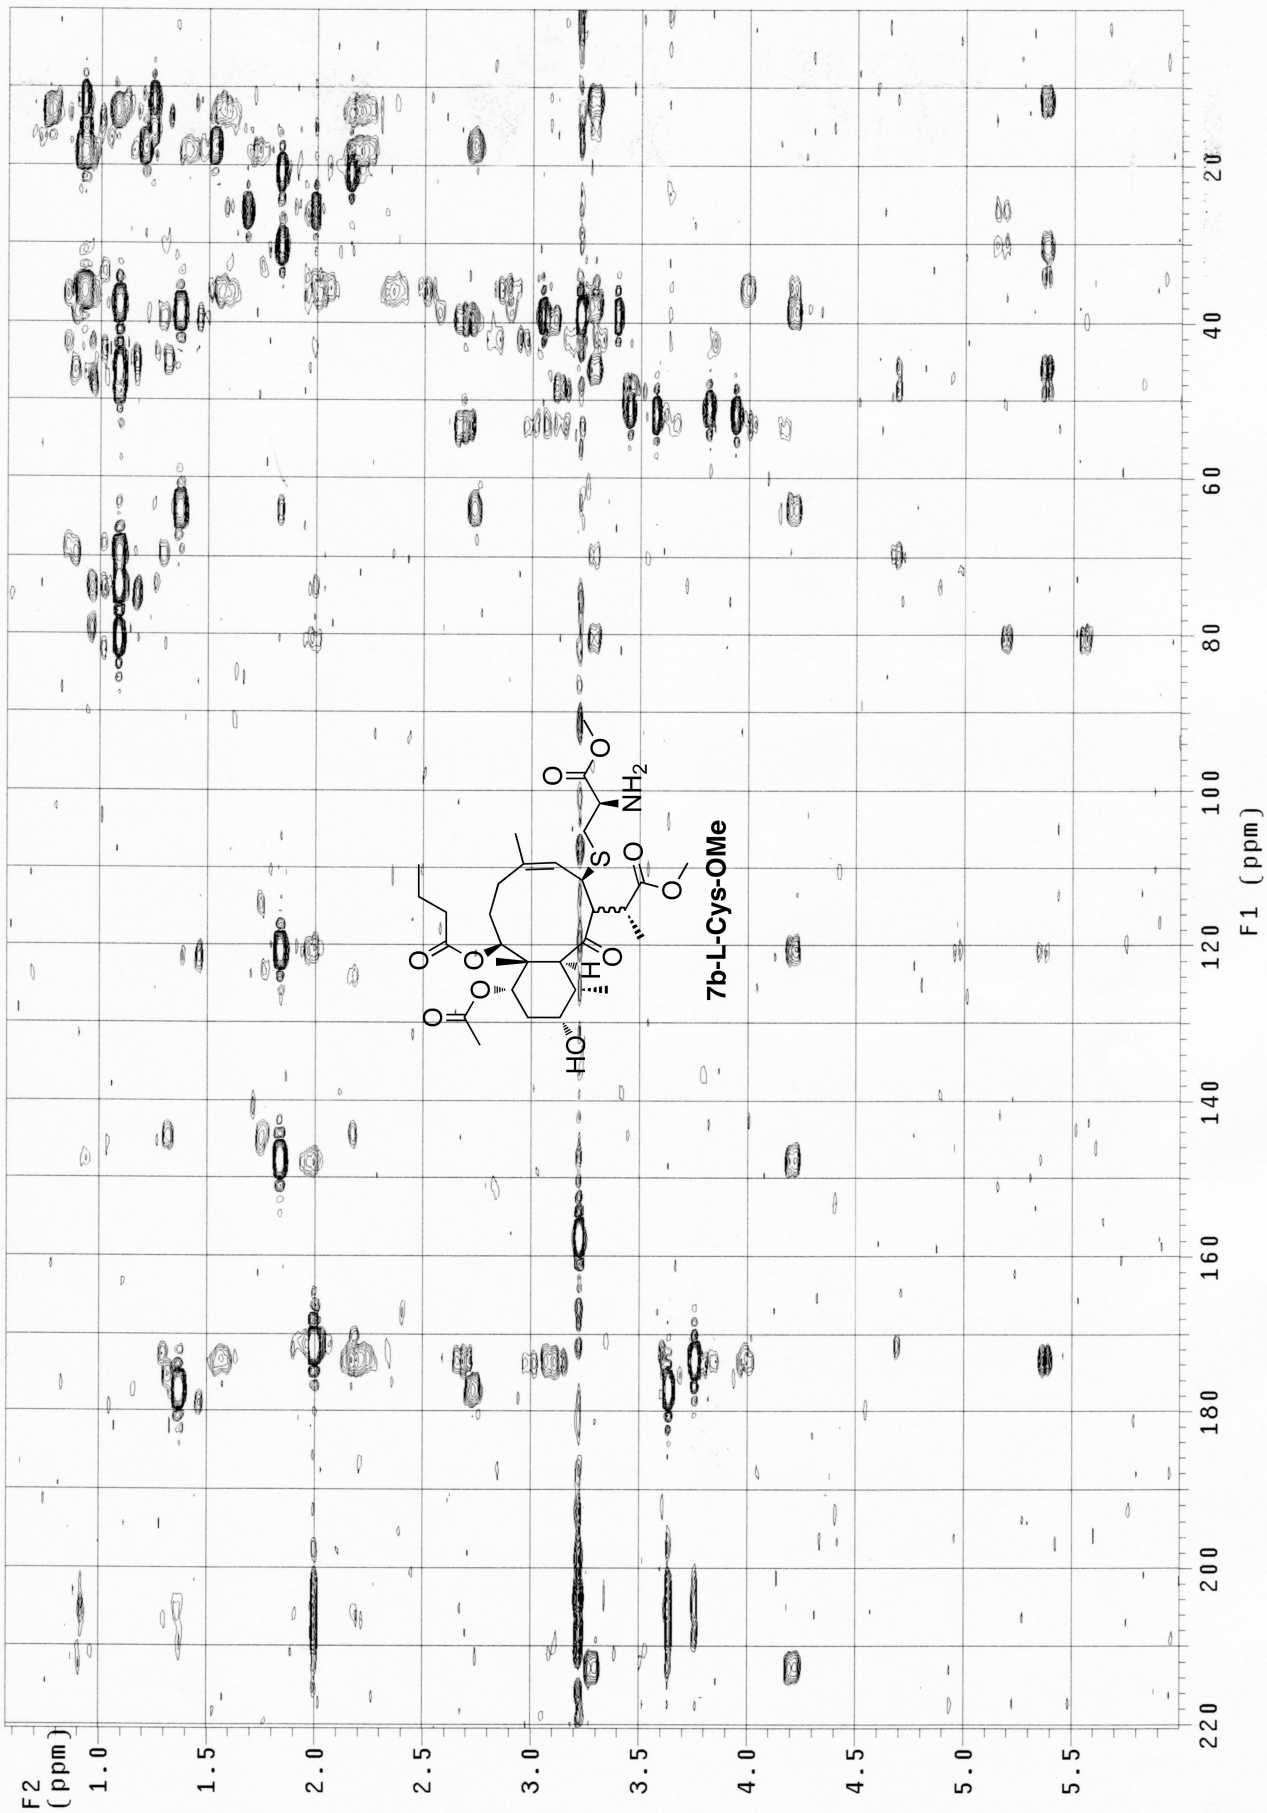

Supplement: NIHMS311317-supplement-1_si_001.pdf [file NIHMS311317-supplement-1_si_001.pdf]
